1     **Autophagy-related genes *atg7* and *beclin1* are essential for energy**  
2     **metabolism and survival during the larval-to-juvenile transition**  
3     **stage of zebrafish**

4                     Suzan Attia Mawed<sup>1, 2, #</sup>, Jin Zhang<sup>1, #</sup>, Fan Ren<sup>1</sup>, Jie Mei<sup>1,\*</sup>

5     <sup>1</sup>College of Fisheries, Huazhong Agricultural University, Wuhan, 430070, China.

6     <sup>2</sup>Zoology Department, Faculty of Science, Zagazig University, Zagazig 44519, Egypt.

7

8

9     # These authors contributed equally to this work.

10

11     \***Corresponding author.** Tel: +86-27-87282113; Fax: +86-27-87282113.

12     *Email address:* [jmei@mail.hzau.edu.cn](mailto:jmei@mail.hzau.edu.cn)

13

14

15

16

17

18

19

20

## 21 **Abstract**

22 High mortality is usually observed during the transition from larvae to juvenile in teleost which  
23 is related to the transition from endogenous to exogenous feeding. Autophagy is an evolutionary  
24 regulated cellular mechanism highly conserved in eukaryotic organisms to maintain energy  
25 homeostasis against stress including starvation. To investigate whether autophagy plays a role  
26 during the larval-juvenile transition, we generated *atg7* and *beclin1* zebrafish mutant lines using  
27 CRISPR/Cas9 technology. In this study, both *atg7* and *beclin1* null zebrafish exhibited a normal  
28 body confirmation; nevertheless, they completely died around 15 dpf and 9 dpf respectively.  
29 During larval-juvenile transition period, *atg7* and *beclin1* mutants were unable to cope with the  
30 metabolic stress after yolk absorption at 5 dpf and fail to activate autophagy in response to  
31 nutrient restriction, and without external feeding, all mutants died nearly at 8 dpf. Dramatic  
32 defects in the intestine architecture and metabolic functions in the liver were observed even  
33 though providing larvae with an external food supply, suggesting that autophagy isn't only  
34 important during yolk depletion but also within food plenty. Treatment with rapamycin, an  
35 activator of autophagy, could effectively extend the survival time of both *atg7* and *beclin1* null  
36 zebrafish through lowering the metabolic rate while it couldn't activate autophagy in mutants via  
37 the canonical pathway. Our findings provided a molecular evidence for the physiological,  
38 histological and metabolic changes that occur during the transition process from the larval to the  
39 juvenile stages and the chief role of autophagy on the body metabolism during these turning  
40 milestones.

41 **Keywords:** Zebrafish, *atg7*, *beclin1*, Metabolism, Rapamycin.

## 42 **Author summary**

43 Zebrafish *Danio rerio* has emerged one of the most powerful research models for studying genes  
44 expression during early embryogenesis and postnatal development. On the basis of the cell  
45 mechanisms, Macroautophagy, a natural regulated pathway disassembles unnecessary or  
46 dysfunctional components orchestrated by more than 36 autophagy related-genes conserved from  
47 yeast to mammals. Among those genes are *atg7* and *beclin1* which have been proved to play an  
48 important role in regulating post natal development in some mammals however their roles during

49 zebrafish development still unedited. During this research, CRISPER/CAS9 were adopted to  
50 know *atg7* and *beclin1* knockout effects on the mutants' metabolism during shifting from  
51 maternal yolk acquisition to exogenous feeding and the role of autophagy during the larvae to  
52 pre-juvenile development. Herein, we found out that larvae couldn't abandon autophagy in both  
53 fasting and feeding conditions as larvae died earlier before pre-juvenile development despite  
54 feeding declaring the importance of autophagy not only to provide the cell with essential  
55 nutrients during starvation but also to get rid of cargos inside the eukaryotic cells. Briefly, if the  
56 larvae didn't recycle those cargos due to autophagy perturbations, they will die despite providing  
57 suitable conditions including food and acclimatization.

## 58 **Introduction**

59 On the basis of the developmental events, the transition from the larval to the juvenile stage is  
60 crucial during fish ontogeny since embryos shifting from maternal yolk acquisition to extrinsic  
61 food resources depending on the cellular metabolism and energy (1). Larva to juvenile transition  
62 is often rapid and involves many morphological, physiological, molecular, and behavioral  
63 adaptations which are energetically costly to suit the new environment (2). However, the  
64 molecular signals controlling the larval-to-juvenile transition remain largely unclear (1, 3).

65 Macroautophagy here referred to as autophagy, alters both anabolic and catabolic processes with  
66 the help of two key sensors, the activated protein kinase (AMPK), a key energy sensor and the  
67 mechanistic target of rapamycin (TOR), a key nutrients sensor(4). Moreover, autophagy involves  
68 in the cytosolic rearrangements needed for differentiation and growth during embryonic  
69 development, which can mediate protein and organelles turnover within a few hours (4, 5).  
70 Under the nutrient-rich condition, mTOR is activated and stimulates anabolic processes such as  
71 gluconeogenesis, protein synthesis, and energy metabolism, whereas catabolic pathway via  
72 autophagy is prohibited (6). During starvation stressors mTOR get switched off, thereby enabling  
73 the activation of autophagy in wild type zebrafish larvae after maternal yolk depletion at 6 dpf (7,  
74 8). Moreover, reactivation of mTOR attenuates autophagy and initiates lysosome regeneration  
75 (9).

76 Up to date, several studies reported that *atg7* silencing results in neurodegeneration (10),  
77 histopathological changes in the liver of mice (11, 12), and tumorigenesis in both murine and

78 human (13). In addition, *atg7* accelerates hepatic glucose production through the action of  
79 glucogenic amino acids in the hepatocytes of the null mouse during nutrient depletion (14). On  
80 the other side, homozygous deletion of *beclin1* is lethal in mice embryo while *beclin1*<sup>+/-</sup> embryos  
81 suffer from a high incidence of spontaneous tumors (15). The novel role of the autophagy  
82 pathway in intestinal microbiota and innate immunity in the small intestine was revealed using  
83 mice with mutations in *atg16L1*, *atg5*, and *atg7*(16, 17). Autophagy is necessary to maintain the  
84 unique structure and proper functions of the exocrine pancreas and trypsinogen activation (18,  
85 19).

86 In this study, we used *atg7* and *beclin1* mutant zebrafish as models to investigate the relationship  
87 between autophagy and metabolism during zebrafish development. There were no phenotypes in  
88 *atg7*<sup>-/-</sup> and *beclin1*<sup>-/-</sup> mutant zebrafish during embryonic development, however both *atg7* and  
89 *beclin1* mutant strains have darken prominent liver in vivo during the period of larval-to-juvenile  
90 transition and died within 15dpf and 9dpf respectively. *Atg7* and *beclin1* mutants were unable to  
91 cope with the metabolic stress after yolk absorption at 5dpf and fail to activate autophagy in  
92 response to nutrient restriction resulted in perturbations in hepatic glycogen/lipid metabolism.  
93 Collectively, our results suggest that autophagy-related genes *atg7* and *beclin1* are required for  
94 maintaining energy homeostasis and mediates liver metabolism during this transition state.

## 95 **Results**

### 96 ***Generation of atg7 and beclin1 mutagenesis by CRISPR/Cas9.***

97 CRISPR/Cas9 system was conducted to generate our zebrafish mutants. Briefly, the sgRNA  
98 targeting sites were chosen in the 10<sup>th</sup> and 4<sup>th</sup> exons of *atg7* and *beclin1*, respectively. Finally,  
99 two *atg7* mutant lines were established, which contained 5-bp and 2-bp deletion, respectively,  
100 named *atg7*Δ5 and *atg7*Δ2 (Fig.1A). Zebrafish *atg7* protein consists of two functional domains  
101 including ATG-N superfamily and E1 enzyme superfamily. The deletions in *atg7*Δ5 and *atg7*Δ2  
102 resulted in a frameshift that caused premature stop codons (Fig.1B). On the other side of genetic  
103 mutation, one *beclin1* mutant line was established, which contained 8-bp deletion, named  
104 *beclin1*Δ8 (Fig. 1C). Zebrafish *beclin1* protein consists of two functional domains including BH3  
105 and APG6 superfamily. The deletions in *beclin1*Δ8 resulted in a frameshift that caused  
106 premature stop codons (Fig.1D).

107 ***Loss of zebrafish atg7 or beclin1 function results in lethality during the larval-to-juvenile***  
108 ***transition***

109 When crossing the male and female *atg7*<sup>+/-</sup> or *beclin1*<sup>+/-</sup> zebrafish, no obvious defects were  
110 observed during the early embryonic development. Interestingly, *atg7* and *beclin1* mutants  
111 exhibited dark prominent liver compared with the wild type and heterozygous strains of the  
112 same population during larvae development (Fig.2A). To clarify this issue, whole mount Oil red  
113 O (ORO) staining was carried out at 7 dpf that ensured the lipid accumulation in the *atg7* mutant  
114 liver and in the whole gastrointestinal tract (GIT) of *beclin1* littermates, while wild type and  
115 heterozygous larvae have nearly the same phenotype of null lipid accumulation (Fig.2B). In  
116 zebrafish, the maternal yolk almost depleted after 5-6 dpf without exogenous feeding WT  
117 zebrafish larvae began to die as early as 6-7 dpf and completely died as later as 13 dpf.  
118 Meanwhile, *atg7* and *beclin1* homozygous mutants died from 6 to 9 dpf and 6 to 8 dpf  
119 respectively, which were identified by the phenotype and genotyping (Figs. 2C, 2D). Moreover,  
120 exogenous feeding couldn't rescue the life of *atg7*<sup>-/-</sup> or *beclin1*<sup>-/-</sup> zebrafish as they started to die  
121 from 6 to 15 dpf and 6 to 9 dpf, respectively (Figs. 2E, 2F). Since *atg7Δ5* and *atg7Δ2* have  
122 nearly the same knockout effect on the protein domain, and survival rate, *atg7Δ5* was applied as  
123 an example of *atg7* knocking out in our further study.

124 During starvation in wild-type zebrafish larvae, mRNA expression of autophagy-related genes  
125 including *atg7*, *beclin1*, *atg5*, *atg12* was gradually increased during starvation from 5 dpf to 8  
126 dpf and began to reduce upon feeding, whereas *p62* expression was gradually reduced upon  
127 starvation and recovered after feeding, indicating that autophagy was induced during the yolk  
128 transition state (Figs. 3A-3E). To further validate the loss of *atg7* and *beclin1* function in mutant  
129 zebrafish; qRT-PCR was conducted at 5<sup>th</sup> and 7<sup>th</sup> dpf on starved mutant larvae and at 8<sup>th</sup> dpf on  
130 the fed group to detect the mRNA expression of the previously mentioned autophagy-related  
131 genes in mutants compared with their wild type siblings (Figs. 3F-3J). Interestingly, *atg7* and  
132 *beclin1* null larvae exhibited a very low gene expression of *atg7* and *beclin1* respectively  
133 (Figs.3F, 3G). Moreover, *atg5* and *atg12* genes expression showed no big difference during the  
134 transition period (Figs. 3H, 3I). On the other side, in both mutants, *p62* expression within the  
135 transition period exhibited a significant increase despite feeding at 8 dpf (Fig. 3J). Our results  
136 suggest that *atg7* and *beclin1* are essential for the larval-juvenile transition around 5-14 dpf and

137 indicates the up-regulation of the autophagy process upon yolk termination that was prohibited in  
138 the mutants of our study.

139 ***Gastrointestinal tract (GIT) developmental defects displayed during the weaning period***  
140 ***between the endogenous and exogenous feeding in atg7- and beclin1-null embryos.***

141 Since the transition from the larval to the juvenile stage is also a transition from endogenous to  
142 exogenous feeding, whole mount in situ hybridization was conducted to determine whether the  
143 early death of *atg7* and *beclin1* mutants was due to developmental defects or metabolic  
144 inadequacy. *Fabp10a*, a marker of the liver (Figs. 4A-4C) and *Villin1* a marker for intestine (Figs.  
145 4G-4I) demonstrated a normal expression pattern before maternal yolk depletion at 72hpf and  
146 5dpf, respectively between WT and *atg7* or *beclin1* mutants, at that time embryos still depend on  
147 the maternal nutrition. Upon yolk depletion at 6 dpf, there was a remarkable decrease in the gene  
148 expression in the mutant strains compared with their WT counterparts for *fabp10a* (Figs. 4D-4F)  
149 as well as *Villin1* expression was down-regulated (Figs.4J-4L), suggesting the beginning of the  
150 malformation during the transition state which might be responsible for the early death of mutant  
151 strains.

152 To further clarify the role of autophagy in pancreatic activity, we examined *trypsin* expression  
153 for exocrine activity and *insulin* expression for the endocrine pancreas. Loss of *atg7* and *beclin1*  
154 function didn't directly interfere with the *insulin* expression at the early development as it  
155 exhibited differences neither prior nor after yolk depletion from 72 hpf till 6 dpf (Figs.4M-4R).  
156 On the other side, *trypsin*, a digestive enzyme gene expressed in the exocrine pancreas, displayed  
157 a lower signal in mutant *atg7* and *beclin1* comparing with WT at 72 hpf (Figs.4S-4U) and with  
158 more remarkable down-regulation at 6 dpf (Figs.4V-4X). In wild-type zebrafish, trypsin  
159 synthesized normally and drained into the duodenum during the weaning period. Contrarily, it  
160 was expressed in a reduced signal area in the *atg7* as well as *beclin1* mutants. After photos  
161 capturing, all larvae were genotyped to confirm our results which indicated that autophagy  
162 dysfunction symptoms manifested in the later developmental stages during the weaning period  
163 between endogenous and exogenous feeding suggesting a critical window during the larval-  
164 juvenile transition.

165 ***Atg7 and beclin1 mutants fail to reactivate autophagy in response to starvation***

166 In wild type during the transition period (5-7 dpf), the maternal yolk was depleted and mTOR  
167 was switched off enabling the activation of autophagy (20). Since autophagy activity is  
168 commonly detected by higher accumulation of autophagy microtubule-associated protein 1 light  
169 chain 3, LC3-II (21) and degradation of ubiquitin-conjugating protein P62/SQSTM1 (22), the  
170 two markers were used to monitor the autophagy flux. In contrast to higher LC3-II protein  
171 accumulation in the liver and intestine of WT larvae (Fig. 5A a), both *atg7* and *beclin1* mutants  
172 showed a great reduction in LC3-II expressions (Figs. 5A b, c). On the other side, P62/SQSTM1  
173 expression was elevated in mutants especially *beclin1* compared with their WT siblings (Figs. 5A  
174 d-f). The same results were obtained from the western-blot analysis of LC3A/B that usually  
175 exhibited in two bands: LC3-I and LC3-II. LC3-II is more appropriate for detecting autophagy  
176 since it ensures the complete transformation of pro-LC3-I. Herein, we detected a dysfunction in  
177 the autophagic signaling cascade in the mutant strains at 7 dpf via accumulation of P62/SQSTM1  
178 and reduction of LC3-II versus their wild type littermates (Fig. 5B). For further verification,  
179 immunofluorescence of liver sections from WT and both mutants also confirmed the latter  
180 results (Figs. 5C, 5D). Accordingly, our results further suggest that *atg7* and *beclin1* mutants fail  
181 to activate autophagy under nutrient depletion as well as the predicted correlation between  
182 autophagy disruption and GIT metabolic disturbance.

183 ***Loss of zebrafish atg7 or beclin1 function leads to abnormal intestinal architecture after***  
184 ***maternal yolk consumption.***

185 In order to investigate the relationship between autophagy activity and intestinal architecture,  
186 longitudinal sections of 7 dpf and 14 dpf larvae were carried out. At 7 dpf, intestinal bulb of WT  
187 larvae was completely developed with normal folds in the intestinal epithelium and visible villi  
188 (Fig. 6A). On the other side, mutant intestinal epithelium seems to be disorganized (Figs. 6B,  
189 6C). The lining epithelia of *atg7*<sup>-/-</sup> and *beclin1*<sup>-/-</sup> appeared abnormal with pyknotic or loss of  
190 nuclear polarity and cellular structure that led to disturbance of the intestinal barrier and  
191 absorptive functions. By 14 dpf, WT intestinal mucosa consists of columnar enterocytes with  
192 basal arranged nuclei (Fig. 6D). On the contrary, *atg7* mutants exhibited abnormal villous  
193 architecture, microvillus atrophy and impaired proliferation of intestinal epithelial cells  
194 accompanied by hyperplasia that often leads to extensive folding and formation of pseudo-crypts



195 (Fig.6E). As expected, *beclin1*<sup>-/-</sup> zebrafish exhibited rapid dramatic intestinal changes than in  
196 *atg7*<sup>-/-</sup> zebrafish, suggesting that *beclin1*<sup>-/-</sup> zebrafish at 7 dpf were in advanced idleness made  
197 them comparable to *atg7*<sup>-/-</sup> zebrafish at 14 dpf. Briefly, *beclin1* mutants showed more severe loss  
198 of intestinal epithelium structure and function with defective villi formation that appeared earlier  
199 than *atg7*<sup>-/-</sup> zebrafish.

### 200 ***Zebrafish atg7 or beclin1 knockout associates with liver metabolic disequilibrium.***

201 During the process of endogenous-exogenous transition, liver plays a vital role in the regulation  
202 of systemic glucose and lipid fluxes during feeding and fasting. After yolk depletion, liver  
203 provides glucose for all tissues of the body by breaking down its own stores of glycogen via the  
204 process of glycolysis (23, 24). At the same time, liver replaces the consumed glycogen through  
205 gluconeogenesis and/or lipolysis that includes the formation of alternative glycogen from non  
206 carbohydrate sources, such as lactate, pyruvate, glycerol, and alanine (25, 26).

207 Herein, liver glycogen content was detected by periodic acid-Schiff (PAS) staining before and  
208 after yolk absorption, at 5, 7 and 14 dpf for *atg7*<sup>-/-</sup> and at 5, 7 dpf for *beclin1*<sup>-/-</sup> mutants. At 5 dpf,  
209 wild-type and both mutant strains contain an adequate amount of hepatic glycogen (Figs.7A, a-  
210 c). At 7dpf, unlike WT, the hepatic glycogen was gradually depleted during the transition state in  
211 mutant strains which suggested an increase of glycolysis and decrease of gluconeogenesis  
212 (Figs.7Ad-f). Within 14 dpf, glycogen stock in *atg7*-null hepatocytes totally vanished compared  
213 with WT (Fig.7A g, h). Interestingly, *atg7*<sup>-/-</sup> intestine still contained residual glycogen suggesting  
214 indigestion as liver glycogen shed towards the intestine. However, it neither digested nor  
215 absorbed due to a disturbance in the trypsin secretion and disordered intestinal epithelia.

216 Lipids can be visualized with the Oil Red O (ORO) dye. Compared with 5,7 and 14 dpf WT  
217 larvae (Figs. 7 B i, l, o), *atg7*- and *beclin1*-null larvae displayed abnormal retention of lipids in  
218 the liver, as well as undigested fat droplets inside the intestine accumulated due to steatosis  
219 (Figs. 7B m, n, p). *Beclin1* mutants exhibited accelerated morphological and cellular hallmarks  
220 of starvation at 7 dpf since hepatic lipid couldn't be utilized in regard to autophagy deficiency in  
221 the mutant liver (Fig.7B n).

222 To further investigate the relationship between autophagy activity and glycolipid flux, mRNA  
223 expression of genes involved in hepatic glycogen and lipid metabolism were evaluated before



224 and after yolk transition at 5, 7 dpf during starvation and at 14 dpf in feeding condition.  
225 Starvation till 7 days will give an indication about the liver metabolic equilibrium during fasting  
226 before shifting to exogenous feeding after 7 dpf till 14 dpf. In our study, genes involved in  
227 gluconeogenesis including *pck1*, *gys2*, and *g6pc3* (Figs.7C-7E) showed no significant difference  
228 between the three studied groups at 5dpf, however, they increased upon starvation at 7 dpf and  
229 decreased again after feeding at 14 dpf in wild type. Interestingly, those genes couldn't be  
230 revived in both *atg7* and *beclin1* mutants during the period of starvation at 7 dpf compared with  
231 their wild type siblings. Contrarily, the mRNA expression of *hkl*, *pfklb*, *gck* genes involved in  
232 glycolysis (Figs.7F-7H) were remarkably elevated in both mutants compared with their WT  
233 within the same population indicating a disturbance in glycogen synthesis and induction of  
234 glycolysis or glycogen consuming during the starvation in both mutants without renewing even  
235 though feeding *atg7* mutants till 14 dpf.

236 In another point of view, genes involved in lipid metabolism were also quantified in the same  
237 timeline of glycogen metabolism, herein, genes involved in lipogenesis process including sterol  
238 regulatory element binding transcription factor 1(*srebp1*) and other lipogenic enzymes such as  
239 acetyl-CoA carboxylase 1 (*ACCI*) and fatty acid synthase (*fasn*) were highly induced in mutants  
240 versus wild type (Figs.7I-7K). Interestingly, these genes still highly expressed in mutants of *atg7*  
241 at 14 dpf despite feeding. On the other side, the expression of genes responsible for hepatic fatty  
242 acid  $\beta$ -oxidation including *acox1*, *cpt1aa* (Figs.7L, 7M) declined sharply in the same mutants  
243 confirming hepatic steatosis via lipid accumulation. For further description, Fatty acid  
244 translocase (*FAT/cd36*), a membrane protein participated in fatty acid uptake of hepatocytes, was  
245 significantly increased in both mutant strains at 7 dpf and at 14 dpf of *atg7* mutants (Fig.7N).  
246 Briefly, autophagy perturbation was highly correlated with the induction of glycolysis and  
247 lipogenesis and inhibition of gluconeogenesis and lipolysis during the larval-juvenile transition  
248 of null *atg7* and *beclin1*.

249 ***Rapamycin enhanced the survival rate of mutants via yolk retention but not through***  
250 ***autophagy induction.***

251 Pharmacological treatment via rapamycin induced a mild general developmental delay and could  
252 slow down the dramatic deterioration in mutant strains resulted in increasing the lifespan 2-3

253 days in both *atg7* and *beclin1* mutants (Figs.8A, 8B). At 7 dpf, we tried to focus on the effect of  
254 rapamycin on the metabolism as well as autophagy during this time point. Accordingly, mutants  
255 of control group exhibit dark liver compared with the wild type, while treated groups manifested  
256 significant delay in yolk absorption (Fig. 8C). Histological observations confirmed the growth  
257 retardation along GIT as intestine of treated larvae were barely detected and yolk sac occupied  
258 almost all the abdominal cavity. Interestingly, we found out that rapamycin could enhance the  
259 metabolism of both mutant strains by glycogen accumulation and hepatic lipid drainage similar  
260 to their WT littermates (Fig. 8D).

261 Treatment with rapamycin increased the protein levels of both LC3-II and P62/SQSTM1 in WT  
262 larvae (Fig. 9Ad, 9Bd). However, rapamycin had no obvious impact on autophagy induction in  
263 *atg7*- and *beclin1*-null larvae, since it couldn't elevate LC3-II or restore P62/SQSTM1 (Fig. 9A  
264 e, f- 9B e, f). For further confirmation, protein expressions of LC3-I/II and P62/SQSTM1 were  
265 detected by western-blot analysis that ensures perturbation of Atg5/Atg7 dependent pathway and  
266 the disability of rapamycin for autophagy reactivation in both mutant strains (Fig. 9C).  
267 Collectively, rapamycin has no further effects on autophagy induction as it depends on mTOR  
268 and ATGs core that involved in the conventional autophagy pathway.

## 269 **Discussion**

270 Autophagy manipulated-deficient models give strong evidence on the role of autophagy in the  
271 early embryogenesis and postnatal development. Therefore, the metabolic balance between food  
272 restriction, autophagy and mTOR displays a dynamic pattern that affects the size of the  
273 organism, proper differentiation, and longevity (27, 28). As long as the food resource is  
274 available, the mammalian target of rapamycin (mTOR) allows cellular anabolism for building  
275 necessary blocks essential for growth and proliferation. During the larval-juvenile transition state  
276 when the maternal yolk depletes, larvae underwent starvation before shifting from endogenous to  
277 exogenous feeding, where they depend on catabolism and/or autophagy to compensate nutrient  
278 deprivation and maintain survival (29, 30). Surprisingly, unlike *atg7*<sup>-/-</sup> and *beclin1*<sup>-/-</sup> mice embryos  
279 that born healthy but died within one day neonatal (11, 15), *atg7* and *beclin1*, null zebrafish in  
280 our study exhibited a normal body confirmation, however, died around 14-15dpf and 8-9 dpf  
281 respectively suffering from reduced glycogen and hepatic steatosis. Furthermore, upon

282 starvation, WT larvae could survive till 13dpf however, starved *atg7*<sup>-/-</sup> and *beclin1*<sup>-/-</sup> quickly  
283 finished yolk around 6 dpf and died within 7-8 dpf due to food restriction and blocking of the  
284 autophagy pathway. Similarly, loss-of-function mutations of *atg7* and *beclin1* reduce the life  
285 span of *Caenorhabditis elegans* (31). Our results authenticate the importance of autophagy  
286 during starvation as well as food richness.

287 Among all autophagy genes, *beclin1* and *atg7* have been focused in our study. Vesicle nucleation  
288 requires *beclin1* that forms a complex with the class-III phosphatidylinositol3-kinase (PI3K)  
289 Vps34. Moreover, the step of subsequent phagophore elongation requires *atg7* that controls the  
290 conjugation between the two ubiquitin-like conjugation pathways; *atg5-atg12* pathway and  
291 microtubule-associated protein1 light chain3 (LC3) lipidation to form membrane-associated  
292 LC3-II (32, 33).

293 Since liver, intestine, and exocrine pancreas are derived from the endoderm during the early  
294 embryonic development (34), WISH experiment reveals the down-regulation of gene markers  
295 related to those three digestive organs after 5 dpf. Generalized defects in the digestive derivatives  
296 indicate the importance of *atg7* and *beclin1* in the early endoderm differentiation. Interestingly,  
297 *trypsin* marker was substantially reduced that indicating its important role in the digestion  
298 process (35, 36). The down-regulation of *trypsin* secretion was also detected in *atg5*<sup>-/-</sup> mice that  
299 were found to reduce pancreatic trypsin secretion and attenuate pancreatic damage (19).

300 For mutagenesis characterization, *atg7* and *beclin1* mRNA expressions were severely reduced in  
301 *atg7* and *beclin1* mutants, respectively indicating the effective gene knockout. Moreover,  
302 starvation till 7dpf elevated the expression of *p62* indicating autophagy disturbance in both  
303 mutants during the endogenous-exogenous transition, these findings put *p62* at a critical situation  
304 that control both cell death and survival(37). On the other side, the expression of *atg5* and *atg12*  
305 nearly didn't change from their wild type siblings however *atg5-atg12* conjugation that is  
306 essential for autophagosome formation is impaired due to the absence of the *atg7* mediation in  
307 both mutants this also was previously explained elsewhere as *atg7* silencing resulted in loss of  
308 the *atg5-atg12* conjugate but doesn't otherwise affect gene expression (38). On approach to  
309 evaluating autophagic flux, contrarily to wild type, our mutants show higher accumulation of

310 p62/SQSTM1 and down-regulation of microtubule-associated protein LC3-II level  
311 demonstrating the effects of knockout on phagophore de-novo formation and/or elongation.  
312 Accordingly, *atg7* and *beclin1* mutants couldn't form mature autophagosomes resulted in  
313 inhibition of cargo sequestration which accounts for increasing of the p62/SQSTM1 level (39).

314 Hyperplasia of multilayered columnar epithelium, dysplasia with nuclear atypia and cellular  
315 pleomorphic malformations are all phenotypes for aged alimentary of zebrafish (40) which  
316 probably be detected in our *atg7* and *beclin1* mutants zebrafish, suggesting that autophagy  
317 blocking has a reverse effect on the longevity and accelerates GIT senescence. Furthermore, it  
318 has been showed that the embryonic phenotype of *beclin1* null mice is more severe than that  
319 *atg5<sup>-/-</sup>* and *atg7<sup>-/-</sup>* mice (11) suggesting that *beclin1* regulated early embryogenesis processes  
320 more than *atg7*. Consistent with these findings, *beclin1* knock-out zebrafish died earlier than  
321 *atg7* null larvae.

322 Regarding the molecular mechanism, the dynamic cross-talk between autophagy, glycogen and  
323 lipid metabolism has been previously studied in *atg7<sup>-/-</sup>* furrier models that exhibited lipoatrophy  
324 with hyperlipidemia and hyperglycemia (41). During starvation, hepatocytes mobilize glycogen  
325 stores promptly to increase the availability of glucose and maintain blood glucose and amino  
326 acid balance (42). At the same time, it induces lipolysis or in other meaning; it accelerates free  
327 fatty acids from peripheral adipose to the liver in order to start the process of ketogenesis then  
328 gluconeogenesis (43). Briefly, there is a high flux through fatty acid  $\beta$ -oxidation including the  
329 conversion of pyruvate and other anaplerotic substrates into glucose via gluconeogenesis and this  
330 has been confirmed in both fasted humans and animal models (44-46).

331 It has been reported that targeted deletion of essential autophagy genes in mice has various  
332 important functions of autophagy including lipid droplet and triglycerides formation (47-49).  
333 Together with our observations, indigested lipid droplets accumulated during nutrient  
334 deprivation and inhibition of autophagy reflects the essential role of *atg7* and *beclin1* in lipid  
335 metabolism (50). Alongside, our results had shown up-regulation of transcription factor *srebfl*,  
336 *ACCI*, and *fasn* that are the key enzymes in the lipid de novo formation (51). Besides that, genes  
337 involved in lipid  $\beta$ -oxidation including *acox1*, *cpt1aa* were highly declined in mutant strains, as

338 well as, *cd36* has been reported to be increased in non-alcoholic fatty liver disease (52). All data  
339 together suggest that lipid accumulation in our autophagy knocked out models is a result of  
340 blocked lipolysis.

341 On the other side, genes involve in glycolysis including *hkl*, *pfklb*, *gck* were up-regulated in  
342 mutants after 5dpf as larvae struggle for surviving in another catabolic pathway (glycolysis) to  
343 compensate autophagy impairment. Moreover, (*g6pc3*) enzyme which catalyzes the conversion of  
344 glucose 6-phosphate (G6P) to glycogen within the hepatocyte (53) was highly reduced in both  
345 mutant strains, unlike wild type that maintains the balance between gluconeogenesis and  
346 glycolysis during fasting and feeding transition. All parameters and results indicated the  
347 correlation between autophagy and the glycogen boundary equilibrium during the transition from  
348 fasting to feeding (14, 54).

349 Rapamycin might be effective in age-related pathologies via activation of autophagy by  
350 enhancing the clearance of aggregate-prone proteins in vitro (55-57) However, Stimulation of  
351 autophagy by rapamycin in knocked-out models is still poorly understood. Previously,  
352 morphometric analysis of rapamycin-treated zebrafish has been established that revealed a great  
353 reduction in the epithelial cells number, size and proliferation hence lower yolk consumption till  
354 9dpf (26, 58). In our study, rapamycin increasing the longevity of *atg7*- and *beclin1*-mutated  
355 through slowing metabolism and dietary restriction which reduced cellular food demand without  
356 malnutrition resulted in metabolic equilibrium. Nevertheless, rapamycin couldn't stimulate  
357 autophagy in mutants throughout the time of treatment as *atg7* and *beclin1* unable to convert  
358 LC3-I into LC3-II or restore the cargo receptor P62/SQSTM1 which expected to be accountable  
359 for the sever deliration of the intestine and strongly correlated with the early death despite  
360 treatment (59-61). Those results indicating that *beclin1* and *atg7* are crucial for rapamycin-  
361 induced and that rapamycin depends on the *atg5-atg7* dependent autophagy pathway  
362 (conventional autophagy) that needs the presence of all ATGs parts including *atg7* as well as  
363 *beclin1*.

364 Briefly, however, the processes that govern success during the transition process from larval to  
365 juvenile are complex and not fully understood; autophagy-related genes in our study provided

366 molecular evidence that indicated the role of autophagy during the turning point in the timeline  
367 of zebrafish development (Fig.10A). During larval-juvenile transition, perturbations of our  
368 studied genes ceased the whole autophagy pathway made the larvae shifted to an easier catabolic  
369 pathway and depend on the stored hepatic glycogen, at the same time they unable to utilize lipid  
370 and/or start gluconeogenesis. Accordingly, the entire metabolic disturbance affects the structure  
371 and function of the gastrointestinal tract and accessory organs and leading to death during larval-  
372 to-juvenile transition even though supporting larvae with external food supply (Fig.10B).

## 373 **Materials and methods**

### 374 *Fish husbandry and mutagenesis screen.*

375 Zebrafish (*Danio rerio*) AB strain was raised according to the established protocols (62). All  
376 experiments involving zebrafish were approved and in compliance with the requirement of the  
377 animal care institution and use committee of Huazhong Agricultural University. Adult zebrafish  
378 were kept in the recirculating system at 28.5°C with 14 h light/10 h dark cycle and larvae were  
379 staged by morphology and age (hours post fertilization, hpf; days post fertilization, dpf).

380 To generate *atg7*- and *beclin1*-mutated zebrafish, CRISPR/Cas9 vectors were constructed for  
381 editing selected specific sites and regions (24). All sgRNAs were designed using CRISPR RGEN  
382 Tools (<http://www.rgenome.net>). The linearized Cas9 plasmids were transcribed into mRNA using  
383 the T7 m MESSAGE Kit (Ambion, USA) and gRNA was synthesized using transcript Aid T7  
384 High Yield Transcription Kit (Thermo Scientific, USA). Zebrafish embryos at the one-cell stage  
385 were co-injected with 20pg target gRNA and 300pg Cas9 mRNA. For genotyping of the mutant  
386 zebrafish, PCR was performed with primers *atg7*-F: 5'-AAATGCCACAGTCCTCCTC-3', *atg7*-  
387 R: 5'-TGAGCCCAGCCTTTATTCT-3', *beclin1*-F: 5'-GTATGCCATCAACCTCCTA-3' and  
388 *beclin1*-R: 5'-AAAGTGAAGCACTGCGAAT-3'.

### 389 *Survival rates, histological assessments, and Whole-mount ORO.*

390 For survival rate, after hatching, mutants of both *atg7* and *beclin1* strains separated via in vivo  
391 darken liver (100 mutants of both strains required to start the experiment). On the other hand,  
392 100 eggs were collected from wild type mating. We also depended on genotyping of dead



393 embryos every day to make sure of the mutagenesis especially for those treated with rapamycin.  
394 The survival probability at any particular time is calculated by the formula given below and  
395 curves given by The Kaplan-Meier plot (63).

$$396 \quad S_t = \frac{\text{Number of fries living at the start} - \text{Number of fries died till that moment}}{\text{Number of fries living at the start}}$$

397

398 For histological observations, *atg7*-mutated and WT larvae were collected at 5, 7 and 14 dpf,  
399 while *beclin1*-mutated were collected before death at 5 and 7 dpf. We opted this time window  
400 when the GIT became totally differentiated to follow the digestive architecture during autophagy  
401 impairment milestones after yolk transition. Genomic DNA of the tail regions n=48 (+/+ : +/- :  
402 -/- = 15: 22: 11) was extracted using sodium hydroxide and Tris-HCl buffer at PH 8 (64) and  
403 the whole larvae bodies were fixed in 4% paraformaldehyde in phosphate buffered saline (PFA)  
404 at 4°C overnight.

405 Histological sections preparation method achieved as described elsewhere (65). Briefly, the  
406 specimens were dehydrated with ethanol series and embedded in paraffin. Tissue sections of 5  
407  $\mu\text{m}$  were prepared using a microtome (Leica Model RM2155). For light microscope analysis,  
408 histological sections were stained with hematoxylin and eosin (H&E), periodic acid-Schiff (PAS)  
409 and Oil Red O (ORO) as previously described (66).

410 Whole-mount ORO staining was carried out on 4% PFA fixed larvae. After dehydration in  
411 ascending series of 1, 2-propanediol, larvae dyed with 0.5 % Oil Red O solution for 12 h at room  
412 temperature then washed in PBS for 20 min and stored at 80 % 1, 2-propanediol till imaging.

#### 413 ***Quantitative real-time PCR (qRT-PCR) and whole-mount RNA in situ hybridization (WISH).***

414 Total RNA was extracted from 35 wild-type larvae using TRIzol (Invitrogen, USA) in successive  
415 days from 5dpf to 8dpf. For *atg7* and *beclin1* after genotyping of tail regions, whole body  
416 homogenates of 36-38 mutant larvae from both strains were collected stored at -80°C degree till  
417 RNA extraction. RNA quality and concentration were evaluated by gel electrophoresis and  
418 NanoDrop 2000, respectively. Isolated RNA was reverse transcribed into cDNA was by Prime  
419 Script TM RT reagent Kit with gDNA Eraser (Stratagene, Takara). Real-time PCR was  
420 performed on ABI-7500 real-time PCR machine (Applied Biosystems, USA) and  $\beta$ -actin was



421 used to normalize the expression values(67).The primer sequences used in qRT-PCR are listed in  
422 tables 1, 2, and 3.

423 For the whole mount in situ hybridization analysis, the partial cDNAs of markers for  
424 differentiated hepatocytes liver fatty acid binding protein 10a *fabp10a* (68), intestinal epithelium  
425 enterocyte differentiation marker *villin1*(69), pancreatic *insulin* and *trypsin* (70, 71) were  
426 amplified using primers listed in table4. Probes were synthesized by in-vitro transcription using  
427 DIG labeling mix and T7 polymerase (Roche, USA). Hybridization was conducted as previously  
428 described (72). The photograph was taken using Leica MZ16FA Microscope by ACImage  
429 software and genotyping was performed after imaging to confirm our results.

#### 430 ***Western blotting and immunohistochemistry assay.***

431 In western blot, trunk regions of sequenced larvae tail of *beclin1* n=132 (+/+ : +/- : -/- = 32: 63:  
432 37) and *atg7* n=126 (+/+ : +/- : -/- = 31: 60: 35) were collected and stored at -80°C.  
433 Homogenates from homozygous larvae of each strain were digested using lysis buffer containing  
434 a protease inhibitor. Samples were boiled for 10 min at 100°C in a ×5 loading buffer, after that,  
435 15µl of total proteins were subjected to SDS-PAGE (Bio-Rad) and carry out electrophoresis then  
436 the fixed gel was electro-transferred it to a nylon membrane. After blocking with 5% skimmed  
437 milk in TBST, nylon membranes were incubated with Primary antibodies include rabbit anti  
438 SQSTM1/P62 (MBL, PM045), rabbit anti-LC3A/B (Cell Signaling Technology, 4108), and anti-  
439 β-actin (Cell signaling, 4967S) respectively. Blots were probed with HRP-conjugated secondary  
440 antibody visualized using ECL western blotting detection reagents.NIH software Image J was  
441 applied for blot scanning and protein area quantifications.

442 For immunohistochemistry, fixed embryos at 7dpf were dehydrated in ascending ethanol,  
443 embedded in paraffin and sectioned at 5 µm intervals using a Reichert-Jung 2050 microtome  
444 (Leica). Sections were deparaffinized and hydrated following by 20 min of antigen retrieval in  
445 sodium citrate buffer (pH 6.0) at 100°C. Slides were treated with 0.3% H<sub>2</sub>O<sub>2</sub> for 10 min to  
446 remove endogenous peroxidase then blocked with 5% BSA in PBST for 1 h at room temperature.  
447 Sections were incubated with first antibodies, rabbit anti-LC3B (Abcam, ab483940) (1:200) and  
448 anti-SQSTM1/P62 (MBL, PM045), (1:500) at 4°C overnight. After 3x PBST washing, 50-100µl

449 HRP secondary antibody was added following staining 3,3' -diaminobenzidine (DAB) substrate  
450 and counterstained with hematoxylin for nuclear differentiation.

451 Immunofluorescence was performed as following steps; after Antigen retrieval by sodium citrate  
452 buffer, slides were blocked with PBS with TritonX-100(PBT) containing 5 % BSA and for 1  
453 hour, then incubated with primary antibodies mentioned previously diluted in PBT overnight  
454 40c. Washing three times again in PBST and incubated with fluoresce in-conjugated secondary  
455 antibodies for 1 hour at room temperature. Nuclei were stained with 4' , 6-diamidino-2-  
456 phenylindole (DAPI) and mounted. Sections were analyzed by fluorescence microscopy using an  
457 Axio Vision image capture system.

#### 458 ***Drug treatment***

459 WT, *atg7* and *beclin1*-mutated embryos were treated from 1st till 7<sup>th</sup> dpf in embryo-medium at  
460 28.5 °C with 400nM rapamycin (CAS53123-88-9 MedChem, Express) prepared in dimethyl  
461 sulfoxide (DMSO). 0.1% DMSO solution (the treatment vehicle) was used for the control  
462 treatment. Drug-containing media were replaced every 24 h. Larvae were collected at 7dpf where  
463 tails genotyped and trunk regions were fixed in a mixture of 40% ethanol, 5% acetic acid and  
464 10% formalin all night at 4°C for immunohistochemistry, and 4% PFA for histological  
465 observations. Nearly 35-40 genotyped larvae from control and each treated group were used for  
466 protein extraction and blotting assay in the western blot experiment.

#### 467 ***Statistical analysis***

468 Data are presented as mean  $\pm$  SD (n=3). Statistical analyses were performed using SPSS and the  
469 data were analyzed by student t-test and one-way ANOVA (\*P < 0.05; \*\*P < 0.01; \*\*\*P <  
470 0.001). Plots were designed using graphpad prism 8 software.

471

472

473

## 474 **Acknowledgments**

475 This work was supported by the Fundamental Research Funds for the Central Universities (534-  
476 180010235, 2662017PY013). The funders had no role in study design, data collection, and  
477 analysis, decision to publish, or preparation of the manuscript.

## 478 **Competing interests**

479 The authors declare that they have no competing interests.

## 480 **References**

- 481 1. Yúfera M, Darias M. The onset of exogenous feeding in marine fish larvae.  
482 *Aquaculture*2007;268(1-4):53-63.
- 483 2. McCormick M, Makey L, Dufour V. Comparative study of metamorphosis in tropical  
484 reef fishes. *Marine Biology*2002;141(5):841-53.
- 485 3. Heyland A, Moroz LL. Signaling mechanisms underlying metamorphic transitions in  
486 animals. *Integrative and Comparative Biology*2006;46(6):743-59.
- 487 4. Cecconi F, Levine B. The role of autophagy in mammalian development: cell makeover  
488 rather than cell death. *Developmental cell*2008;15(3):344-57.
- 489 5. Tsukamoto S, Kuma A, Murakami M, Kishi C, Yamamoto A, Mizushima N. Autophagy  
490 is essential for preimplantation development of mouse embryos. *Science*2008;321(5885):117-20.
- 491 6. Hay N, Sonenberg N. Upstream and downstream of mTOR. *Genes &*  
492 *development*2004;18(16):1926-45.
- 493 7. Marshall KE, Tomasini AJ, Makky K, N Kumar S, Mayer AN. Dynamic Lkb1-TORC1  
494 signaling as a possible mechanism for regulating the endoderm-intestine transition.  
495 *Developmental Dynamics*2010;239(11):3000-12.
- 496 8. Boglev Y, Badrock AP, Trotter AJ, Du Q, Richardson EJ, Parslow AC, Markmiller SJ,  
497 Hall NE, de Jong-Curtain TA, Ng AY. Autophagy induction is a Tor-and Tp53-independent cell  
498 survival response in a zebrafish model of disrupted ribosome biogenesis. *PLoS*  
499 *genetics*2013;9(2):e1003279.
- 500 9. Yu L, McPhee CK, Zheng L, Mardones GA, Rong Y, Peng J, Mi N, Zhao Y, Liu Z, Wan  
501 F. Termination of autophagy and reformation of lysosomes regulated by mTOR.  
502 *Nature*2010;465(7300):942-6.
- 503 10. Chen S-F, Kang M-L, Chen Y-C, Tang H-W, Huang C-W, Li W-H, Lin C-P, Wang C-Y,  
504 Wang P-Y, Chen G-C. Autophagy-related gene 7 is downstream of heat shock protein 27 in the  
505 regulation of eye morphology, polyglutamine toxicity, and lifespan in *Drosophila*. *Journal of*  
506 *biomedical science*2012;19(1):52.
- 507 11. Komatsu M, Waguri S, Ueno T, Iwata J, Murata S, Tanida I, Ezaki J, Mizushima N,  
508 Ohsumi Y, Uchiyama Y. Impairment of starvation-induced and constitutive autophagy in *Atg7*-  
509 deficient mice. *J Cell Biol*2005;169(3):425-34.

- 510 12. Yang L, Li P, Fu S, Calay ES, Hotamisligil GS. Defective hepatic autophagy in obesity  
511 promotes ER stress and causes insulin resistance. *Cell metabolism*2010;11(6):467-78.
- 512 13. Lévy J, Cacheux W, Bara MA, L'hermitte A, Lepage P, Fraudeau M, Trentesaux C,  
513 Lemarchand J, Durand A, Crain A-M. Intestinal inhibition of Atg7 prevents tumour initiation  
514 through a microbiome-influenced immune response and suppresses tumour growth. *Nature cell*  
515 *biology*2015;17(8):1062.
- 516 14. Ezaki J, Matsumoto N, Takeda-Ezaki M, Komatsu M, Takahashi K, Hiraoka Y, Taka H,  
517 Fujimura T, Takehana K, Yoshida M. Liver autophagy contributes to the maintenance of blood  
518 glucose and amino acid levels. *Autophagy*2011;7(7):727-36.
- 519 15. Yue Z, Jin S, Yang C, Levine AJ, Heintz N. Beclin 1, an autophagy gene essential for  
520 early embryonic development, is a haploinsufficient tumor suppressor. *Proceedings of the*  
521 *National Academy of Sciences*2003;100(25):15077-82.
- 522 16. Elphick D, Mahida Y. Paneth cells: their role in innate immunity and inflammatory  
523 disease. *Gut*2005;54(12):1802-9.
- 524 17. Cadwell K, Patel KK, Komatsu M, Virgin I, Herbert W, Stappenbeck TS. A common role  
525 for Atg16L1, Atg5, and Atg7 in small intestinal Paneth cells and Crohn disease.  
526 *Autophagy*2009;5(2):250-2.
- 527 18. Mareninova OA, Hermann K, French SW, O'Konski MS, Pandol SJ, Webster P,  
528 Erickson AH, Katunuma N, Gorelick FS, Gukovsky I. Impaired autophagic flux mediates acinar  
529 cell vacuole formation and trypsinogen activation in rodent models of acute pancreatitis. *The*  
530 *Journal of clinical investigation*2009;119(11):3340.
- 531 19. Hashimoto D, Ohmuraya M, Hirota M, Yamamoto A, Suyama K, Ida S, Okumura Y,  
532 Takahashi E, Kido H, Araki K. Involvement of autophagy in trypsinogen activation within the  
533 pancreatic acinar cells. *The Journal of cell biology*2008;181(7):1065-72.
- 534 20. Efeyan A, Zoncu R, Chang S, Gumper I, Snitkin H, Wolfson RL, Kirak O, Sabatini DD,  
535 Sabatini DM. Regulation of mTORC1 by the Rag GTPases is necessary for neonatal autophagy  
536 and survival. *Nature*2013;493(7434):679-83.
- 537 21. Sugawara K, Suzuki NN, Fujioka Y, Mizushima N, Ohsumi Y, Inagaki F. The crystal  
538 structure of microtubule-associated protein light chain 3, a mammalian homologue of  
539 *Saccharomyces cerevisiae* Atg8. *Genes to Cells*2004;9(7):611-8.
- 540 22. Bjørkøy G, Lamark T, Pankiv S, Øvervatn A, Brech A, Johansen T. Monitoring  
541 autophagic degradation of p62/SQSTM1. *Methods in enzymology*2009;452:181-97.
- 542 23. Wang S, Miller SR, Ober EA, Sadler KC. Chapter Five-Making It New Again: Insight  
543 Into Liver Development, Regeneration, and Disease From Zebrafish Research. *Current Topics in*  
544 *Developmental Biology*2017;124:161-95.
- 545 24. Pack M, Solnica-Krezel L, Malicki J, Neuhauss S, Schier AF, Stemple DL, Driever W,  
546 Fishman MC. Mutations affecting development of zebrafish digestive organs.  
547 *Development*1996;123(1):321-8.
- 548 25. Mayes PA, Bender DA, Murray R, Granner D, Rodwell V. Gluconeogenesis and control  
549 of the blood glucose. *Harper's Illustrated Biochemistry* 26th ed New York: Lange Medical  
550 Books/McGraw-Hill2003:153-62.
- 551 26. Sucularli C, Shehwana H, Kuscu C, Dungul DC, Ozdag H, Konu O. Functionally  
552 conserved effects of rapamycin exposure on zebrafish. *Molecular medicine*  
553 *reports*2016;13(5):4421-30.

- 554 27. Johnson SC, Rabinovitch PS, Kaeberlein M. mTOR is a key modulator of ageing and  
555 age-related disease. *Nature*2013;493(7432):338.
- 556 28. Meléndez A, Tallóczy Z, Seaman M, Eskelinen E-L, Hall DH, Levine B. Autophagy  
557 genes are essential for dauer development and life-span extension in *C. elegans*.  
558 *Science*2003;301(5638):1387-91.
- 559 29. Shimobayashi M, Hall MN. Making new contacts: the mTOR network in metabolism and  
560 signalling crosstalk. *Nature reviews Molecular cell biology*2014;15(3):155.
- 561 30. Laplante M, Sabatini DM. Regulation of mTORC1 and its impact on gene expression at a  
562 glance. *The Company of Biologists Ltd*; 2013.
- 563 31. Tóth ML, Sigmond T, Borsos É, Barna J, Erdélyi P, Takács-Vellai K, Orosz L, Kovács  
564 AL, Csikós G, Sass M. Longevity pathways converge on autophagy genes to regulate life span in  
565 *Caenorhabditis elegans*. *Autophagy*2008;4(3):330-8.
- 566 32. Ohsumi Y, Mizushima N, editors. Two ubiquitin-like conjugation systems essential for  
567 autophagy. *Seminars in Cell and Developmental Biology*; 2004.
- 568 33. Tanida I, Sou Y-s, Ezaki J, Minematsu-Ikeguchi N, Ueno T, Kominami E.  
569 HsAtg4B/HsApg4B/autophagin-1 cleaves the carboxyl termini of three human Atg8 homologues  
570 and delipidates microtubule-associated protein light chain 3-and GABAA receptor-associated  
571 protein-phospholipid conjugates. *Journal of Biological Chemistry*2004;279(35):36268-76.
- 572 34. Ober EA, Field HA, Stainier DY. From endoderm formation to liver and pancreas  
573 development in zebrafish. *Mechanisms of development*2003;120(1):5-18.
- 574 35. Biemar F, Argenton F, Schmidtke R, Epperlein S, Peers B, Driever W. Pancreas  
575 development in zebrafish: early dispersed appearance of endocrine hormone expressing cells and  
576 their convergence to form the definitive islet. *Developmental biology*2001;230(2):189-203.
- 577 36. Antonucci L, Fagman JB, Kim JY, Todoric J, Gukovsky I, Mackey M, Ellisman MH,  
578 Karin M. Basal autophagy maintains pancreatic acinar cell homeostasis and protein synthesis and  
579 prevents ER stress. *Proceedings of the National Academy of Sciences*2015;112(45):E6166-E74.
- 580 37. Moscat J, Diaz-Meco MT. p62 at the crossroads of autophagy, apoptosis, and cancer.  
581 *Cell*2009;137(6):1001-4.
- 582 38. Jounai N, Takeshita F, Kobiyama K, Sawano A, Miyawaki A, Xin K-Q, Ishii KJ, Kawai  
583 T, Akira S, Suzuki K. The Atg5-Atg12 conjugate associates with innate antiviral immune  
584 responses. *Proceedings of the National Academy of Sciences*2007;104(35):14050-5.
- 585 39. Wang C, Chen S, Yeo S, Karsli-Uzunbas G, White E, Mizushima N, Virgin HW, Guan J-  
586 L. Elevated p62/SQSTM1 determines the fate of autophagy-deficient neural stem cells by  
587 increasing superoxide. *J Cell Biol*2016;212(5):545-60.
- 588 40. Paquette CE. Intestinal hyperplasia and neoplasms in zebrafish (*Danio rerio*) 2013.
- 589 41. Zhang Y, Goldman S, Baerga R, Zhao Y, Komatsu M, Jin S. Adipose-specific deletion of  
590 autophagy-related gene 7 (*atg7*) in mice reveals a role in adipogenesis. *Proceedings of the*  
591 *National Academy of Sciences*2009;106(47):19860-5.
- 592 42. Kalamidas SA, Kotoulas O. Glycogen autophagy in newborn rat hepatocytes. *Histology*  
593 *and histopathology*2000;15(4):1011-8.
- 594 43. Hugo SE, Cruz-Garcia L, Karanth S, Anderson RM, Stainier DY, Schlegel A. A  
595 monocarboxylate transporter required for hepatocyte secretion of ketone bodies during fasting.  
596 *Genes & development*2012;26(3):282-93.



- 597 44. Magnusson I, Schumann W, Bartsch G, Chandramouli V, Kumaran K, Wahren J, Landau  
598 B. Noninvasive tracing of Krebs cycle metabolism in liver. *Journal of Biological*  
599 *Chemistry*1991;266(11):6975-84.
- 600 45. Diraison F, Large V, Brunengraber H, Beylot M. Non-invasive tracing of liver  
601 intermediary metabolism in normal subjects and in moderately hyperglycaemic NIDDM  
602 subjects. Evidence against increased gluconeogenesis and hepatic fatty acid oxidation in  
603 NIDDM. *Diabetologia*1998;41(2):212-20.
- 604 46. Burgess SC, Jeffrey FM, Storey C, Milde A, Hausler N, Merritt ME, Mulder H, Holm C,  
605 Sherry AD, Malloy CR. Effect of murine strain on metabolic pathways of glucose production  
606 after brief or prolonged fasting. *American Journal of Physiology-Endocrinology and*  
607 *Metabolism*2005.
- 608 47. Shibata M, Yoshimura K, Furuya N, Koike M, Ueno T, Komatsu M, Arai H, Tanaka K,  
609 Kominami E, Uchiyama Y. The MAP1-LC3 conjugation system is involved in lipid droplet  
610 formation. *Biochemical and biophysical research communications*2009;382(2):419-23.
- 611 48. Singh R, Kaushik S, Wang Y, Xiang Y, Novak I, Komatsu M, Tanaka K, Cuervo AM,  
612 Czaja MJ. Autophagy regulates lipid metabolism. *Nature*2009;458(7242):1131.
- 613 49. Takamura A, Komatsu M, Hara T, Sakamoto A, Kishi C, Waguri S, Eishi Y, Hino O,  
614 Tanaka K, Mizushima N. Autophagy-deficient mice develop multiple liver tumors. *Genes &*  
615 *development*2011;25(8):795-800.
- 616 50. Rodriguez-Navarro JA, Cuervo AM, editors. *Autophagy and lipids: tightening the knot.*  
617 *Seminars in immunopathology*; 2010: Springer.
- 618 51. Solinas G, Borén J, Dulloo AG. De novo lipogenesis in metabolic homeostasis: More  
619 friend than foe? *Molecular metabolism*2015;4(5):367-77.
- 620 52. Miquilena-Colina ME, Lima-Cabello E, Sánchez-Campos S, García-Mediavilla MV,  
621 Fernández-Bermejo M, Lozano-Rodríguez T, Vargas-Castrillón J, Buqué X, Ochoa B,  
622 Aspichueta P. Hepatic fatty acid translocase CD36 upregulation is associated with insulin  
623 resistance, hyperinsulinaemia and increased steatosis in non-alcoholic steatohepatitis and chronic  
624 hepatitis C. *Gut*2011;60(10):1394-402.
- 625 53. Exton J. Gluconeogenesis. *Metabolism*1972;21(10):945-90.
- 626 54. Ha J, Guan K-L, Kim J. AMPK and autophagy in glucose/glycogen metabolism.  
627 *Molecular aspects of medicine*2015;46:46-62.
- 628 55. Ravikumar B, Duden R, Rubinsztein DC. Aggregate-prone proteins with polyglutamine  
629 and polyalanine expansions are degraded by autophagy. *Human molecular*  
630 *genetics*2002;11(9):1107-17.
- 631 56. Ravikumar B, Vacher C, Berger Z, Davies JE, Luo S, Oroz LG, Scaravilli F, Easton DF,  
632 Duden R, O'Kane CJ. Inhibition of mTOR induces autophagy and reduces toxicity of  
633 polyglutamine expansions in fly and mouse models of Huntington disease. *Nature*  
634 *genetics*2004;36(6):585.
- 635 57. Berger Z, Ravikumar B, Menzies FM, Oroz LG, Underwood BR, Pangalos MN, Schmitt  
636 I, Wullner U, Evert BO, O'kane CJ. Rapamycin alleviates toxicity of different aggregate-prone  
637 proteins. *Human molecular genetics*2005;15(3):433-42.
- 638 58. Makky K, Tekiela J, Mayer AN. Target of rapamycin (TOR) signaling controls epithelial  
639 morphogenesis in the vertebrate intestine. *Developmental biology*2007;303(2):501-13.

- 640 59. Pankiv S, Clausen TH, Lamark T, Brech A, Bruun J-A, Outzen H, Øvervatn A, Bjørkøy  
641 G, Johansen T. p62/SQSTM1 binds directly to Atg8/LC3 to facilitate degradation of  
642 ubiquitinated protein aggregates by autophagy. *Journal of biological*  
643 *chemistry*2007;282(33):24131-45.
- 644 60. Schläfli A, Berezowska S, Adams O, Langer R, Tschan M. Reliable LC3 and p62  
645 autophagy marker detection in formalin fixed paraffin embedded human tissue by  
646 immunohistochemistry. *European journal of histochemistry: EJH*2015;59(2).
- 647 61. Varga M, Fodor E, Vellai T. Autophagy in zebrafish. *Methods*2015;75:172-80.
- 648 62. Westerfield M. *The zebrafish book: a guide for the laboratory use of zebrafish*  
649 *(Brachydanio rerio)*: University of Oregon Press; 1995.
- 650 63. Goel MK, Khanna P, Kishore J. Understanding survival analysis: Kaplan-Meier estimate.  
651 *International journal of Ayurveda research*2010;1(4):274.
- 652 64. Meeker ND, Hutchinson SA, Ho L, Trede NS. Method for isolation of PCR-ready  
653 genomic DNA from zebrafish tissues. *Biotechniques*2007;43(5):610.
- 654 65. Yee NS, Pack M. Zebrafish as a model for pancreatic cancer research. *Pancreatic Cancer:*  
655 *Methods and Protocols*2005:273-98.
- 656 66. van der Velden YU, Wang L, Zevenhoven J, van Rooijen E, van Lohuizen M, Giles RH,  
657 Clevers H, Haramis A-PG. The serine-threonine kinase LKB1 is essential for survival under  
658 energetic stress in zebrafish. *Proceedings of the National Academy of*  
659 *Sciences*2011;108(11):4358-63.
- 660 67. Zhang J, Zhang X, Liu Y, Su Z, Dawar FU, Dan H, He Y, Gui J-F, Mei J. Leucine  
661 mediates autophagosome-lysosome fusion and improves sperm motility by activating the  
662 PI3K/Akt pathway. *Oncotarget*2017;8(67):111807.
- 663 68. Hong S-K, Dawid IB. Alpha2 macroglobulin-like is essential for liver development in  
664 zebrafish. *PloS one*2008;3(11):e3736.
- 665 69. Wang Z, Du J, Lam SH, Mathavan S, Matsudaira P, Gong Z. Morphological and  
666 molecular evidence for functional organization along the rostrocaudal axis of the adult zebrafish  
667 intestine. *Bmc Genomics*2010;11(1):392.
- 668 70. Lin JW, Biankin AV, Horb ME, Ghosh B, Prasad NB, Yee NS, Pack MA, Leach SD.  
669 Differential requirement for *ptfla* in endocrine and exocrine lineages of developing zebrafish  
670 pancreas. *Developmental biology*2004;270(2):474-86.
- 671 71. Argenton F, Zecchin E, Bortolussi M. Early appearance of pancreatic hormone-  
672 expressing cells in the zebrafish embryo. *Mechanisms of development*1999;87(1-2):217-21.
- 673 72. Thisse C, Thisse B. High-resolution in situ hybridization to whole-mount zebrafish  
674 embryos. *Nature protocols*2008;3(1):59.

675

676

677

678



## 679 **Figure legends**

680 **Figure1. Generation of *atg7* and *beclin1* mutated zebrafish:** (A): Schematic representation of  
681 zebrafish *atg7* and its two mutated types (*atg7Δ5* and *atg7Δ2*). The thin lines and grey boxes  
682 represent the introns and exons, respectively. The sgRNA target sequence is shown in red,  
683 followed by a PAM sequence “TGG” shown in blue. (B): Illustration of deduced protein  
684 structures of wild-type *atg7* (top) and two mutageneses (middle and bottom).(C): Schematic  
685 representation of zebrafish *beclin 1* and mutant line (*beclin1Δ8*). The sgRNA target sequence is  
686 shown in red, followed by a PAM sequence “TGG”.(D): The structure of the deduced protein  
687 domain of wild type *beclin1* (top) and the represented mutant line (bottom).

688 **Figure2. Mutations of *atg7* and *beclin1* caused lethality during the larval-to-juvenile**  
689 **transition.** (A): 7dpf larvae of the indicated genotypes shown live.(B): Whole-mount Oil Red O  
690 staining indicates lipid droplets stained in-situ of 7dpf genotyped larvae. Arrows indicate  
691 zebrafish liver with no detected difference between wild type and heterozygous of both strains .(C-  
692 D): Meire Kaplan graphs depicting the surviving rate upon fasting, WT started to die at 6 dpf  
693 along with the two mutants lines of *atg7<sup>-/-</sup>*(Fig.C) and *beclin1Δ8* (Fig.D). WT could survive till  
694 13 dpf whereas *atg7<sup>-/-</sup>* and *beclin1<sup>-/-</sup>* completely died at 9 and 8 dpf respectively.(E-F): Meire  
695 Kaplan graphs depicting the surviving rate upon feeding of two mutant lines of *atg7* (*atg7Δ5* and  
696 *atg7Δ2*) and *beclin1Δ8* compared with WT.

697 **Figure3. Wild type but not mutants exhibited autophagy induction during larval-juvenile**  
698 **transitionm:** (A-E) mRNA expression of *atg7*, *beclin1*, *atg5*, *atg12*, and *p62* respectively were  
699 evaluated by qRT-PCR in wild-type indicated actual autophagy induction upon starvation (5-  
700 8dpf). (F-J): Characterization of zebrafish *atg7* and *beclin1* mutations through mRNA expression  
701 using previous autophagy-related genes compared with their wild type siblings at 5,7 and 8 dpf  
702 with a significant lower expression of knockedout genes and *p62* elevating. Data were  
703 representative of three independent experiments and expressed as mean ± SD.\* P <0.05, \*  
704 \*P<0.01, and \* \* \*P < 0.001.

705 **Figure4. *Atg7* and *beclin1* affect the gastrointestinal tract and accessory organs after yolk**  
706 **depletion.** RNA in situ hybridization was performed with *fabp10a* (A-F), *villin*. (G-L), showing  
707 lower signals for liver and enterocyte differentiation respectively at 6 dpf. ( M-R) pancreatic

708 *insulin*, a marker of the endocrine pancreas at 72 hpf and 6 dpf. (S-X): larvae stained with probes  
709 against *trypsin*, a marker for terminal differentiation of the exocrine pancreas that exhibited at  
710 lower expression in mutant *atg7* and *beclin1*. Number of larvae shown within the whole  
711 population number (n=20) L.V: lateral view, D.V: dorsal view.

712 **Figure5. Mutant strains were unable to activate autophagy during metabolic stress.** (A):  
713 Immunohistochemistry assay of longitudinal sections (5  $\mu$ m) of starved 7 dpf larvae blocked  
714 against LC3-II (a-c) and P62/SQSTM1 (d-f) showed impairment autophagy flux in both mutants  
715 unlike wild type. (B): Representative western blots of the three genotyped strains showed relative  
716 protein expression of P62/SQSTM1 and LC3-II,  $\beta$ -actin was used as the control. The ratio of  
717 p62/ $\beta$ -actin and LC3-II/ $\beta$ -actin quantified by NIH software Image J. Progressive P62/SQSTM1  
718 accumulation in mutant larvae reveals the impaired autophagy and liver toxicity. (C-D):  
719 Immunofluorescence of the hepatic transverse regions of both *atg7* and *beclin1* mutants and wild  
720 type confirming the autophagy blocking in the mutants. L: liver; in: intestine. \*P < 0.05, \*\*P <  
721 0.01, and \*\*\*P < 0.001.

722 **Figure6. Loss of *atg7* and *beclin1* led to defects in the gastrointestinal architecture:** (A-E):  
723 Representative photomicrographs of H&E stained sections of 7dpf and 14 dpf larvae  
724 demonstrating the disproportionate intestinal architecture of *atg7 $\Delta$ 5* and *beclin1 $\Delta$ 8* compared  
725 with WT which exhibited nicely organized villi with linearized enterocytes and arranged nuclei  
726 (A and D) unlike the improper pseudo villi and nuclear atypia in mutants (B, C and E ).The  
727 lower pictures are magnified part of the intestinal villi inside the blue squares.

728 **Figure7. *Atg7* and *beclin1* mutant exhibit disturbed hepatic hallmarks and affect glycogen-  
729 lipid flux in response to starvation.** (A): Longitudinal sections stained with PAS of WT, *atg7*  
730 and *beclin1* mutant livers at 5, 7 and 14 dpf. WT liver still contains an adequate amount of  
731 glycogen from the 5 dpf till 14 dpf (a, d, g), whereas glycogen depleted gradually in *atg7 $\Delta$ 5* and  
732 *beclin1 $\Delta$ 8*. At 7dpf, *atg7 $\Delta$ 5* showed disturbance of hepatic glycogen absorption represented by  
733 black arrows (7A e). *Beclin1* mutants exhausted earlier where hepatic glycogen vanished by 7dpf  
734 suggesting earlier metabolic disturbance (7A f). (B): Oil Red O staining of longitudinal frozen  
735 sections passed through the liver with remarkable undigested intestinal lipid and triglycerides  
736 aggregation at 5 and 7dpf in mutant livers, suggesting steatohepatitis that appeared earlier in

737 *beclin1* mutants (7B n) than *atg7* mutants (7B m). (C-E): mRNA expression of genes involved  
738 in hepatic gluconeogenesis. (F-H): mRNA expression of selected genes involved in glycolysis  
739 process depicting the relation between autophagy knockout and glycogen depletion during  
740 feeding-fasting transition. (I-K): mRNA expression of genes involved in lipogenesis. (L-N):  
741 mRNA expression of genes involved in lipolysis indicating hepatic steatosis in *atg7* and *beclin1*  
742 null larvae via inhibition of fatty acids  $\beta$  oxidation. Data were representative of three  
743 independent experiments and expressed as mean  $\pm$  SD. \* P <0.05, \* \*P<0.01, and \* \* \*P < 0.001.  
744 L: liver. in: intestine.

745 **Figure8. Rapamycin affects the survival rate and induced morphological developmental**  
746 **delay.** (A-B): Meire Kaplan graphs depicting the survival rate after rapamycin treatment in *atg7*  
747 and *beclin1* mutants. (C): Control and treated embryos are shown live. Embryos treated with  
748 rapamycin have a generalized developmental delay with yolk retention and deceleration of  
749 digestive system growth. (D): Longitudinal sections of rapamycin-treated embryos stained with  
750 H&E (a-c), PAS (d-f) and ORO (g-i) indicating metabolic refreshment after rapamycin and  
751 intestinal development delay. in: intestine; L: liver; Y: yolk.

752 **Figure9. Effects of rapamycin on autophagy flux.** (A): Immunohistochemistry assay of  
753 transverse sections from control and rapamycin treated larvae with no impact on LC3-II in  
754 mutants contrary WT. (B): Rapamycin couldn't restore P62/SQSTM1 in both mutants as well as  
755 in WT. (C): Representative immunoblots showed LC3 I/II and P62/SQSTM1 proteins of control  
756 and rapamycin-treated embryos at 7 dpf starved.  $\beta$ -actin was used for normalization and relative  
757 protein levels were quantified using NIH software Image J. \* P <0.05, \* \*P<0.01, and \* \* \*P <  
758 0.001. L: liver; Y: yolk.

759 **Figure10. A proposed model of *atg7* and *beclin1* functions during the larvae-juvenile**  
760 **transition.** (A): Schematic diagram represents the embryonic development timeline and the  
761 observed death altitudes of studied mutants as result of autophagy perturbation. (B): Schematic  
762 diagram shows the possible death pathways that affect mutant during early development after  
763 yolk depletion indicating the role of autophagy during the shifting from endogenous to  
764 exogenous feeding.

## 765 **Supporting information legends**

### 766 **1- Supporting figures legends**

767 **S1 Fig: HSP distribution on query sequence of *atg7* and *beclin1* CRISPR/Cas9 knock-out**  
768 **target sites.** (A): Sequences information of *atg7* target site blast against zebrafish genome. (B): The  
769 location information of target sites *atg7* in chromosome 11 in zebrafish genome. (C): Sequences  
770 information of *beclin1* target site blast against zebrafish genome. (D): The location information of  
771 *beclin1* target sites in chromosome 12 of zebrafish genome. The red box represents the location of  
772 the target gene while the red arrow represents the location of target site. According to the  
773 information of zebrafish *atg7* and *beclin1* in Ensembl (*atg7* ENSDARG00000102893, *becn1*  
774 ENSDARG00000079128).

775 **S2 Fig: Agarose gel electrophoresis of Cas9 mRNA and gRNA mRNA.** (A): Agarose gel  
776 electrophoresis of Cas9mRNA, marker used is DL2000 DNA marker, L1, L2, L3 indicates Cas9  
777 mRNA in triplicate running. (B): Agarose gel electrophoresis of *atg7* gRNA using DL2000  
778 DNA marker, lines L1,L2,L3 indicates gRNA in triplicate running with 150bp. (C): Agarose gel  
779 electrophoresis of *beclin1* gRNA using DL2000 DNA marker, lines L1,L2,L3 indicates gRNA  
780 in triplicate running with 200bp.

781 **S3 Fig: Schematic diagram depicting the functionality of the CRISPR/Cas9 system.** (1): Humanized  
782 Cas9 and gmRNA were co-injected in one cell wild type eggs.(2): Confirmation of target mutation by  
783 PCR and PMD cloning from the tail region of the grown injected eggs.(3): Generation of F1 from paired  
784 mating of heterozygous and wild type strains. (4): Generation of F2 from heterozygous of the same  
785 population mating to produce 25%. of mutant embryos with the effective gene knockout .

786 **S4 Fig: Agarose gel electrophoresis of PCR amplification results.** Genomic DNA was  
787 extracted from the larvae tail and PCR was conducted at 58°C annealing temperature. The  
788 product length was 399bp in *atg7* and 310 for *beclin1* and most of our results were effective  
789 appeared as bright band at right amplification using DL 2000 DNA marker.

790 **S5 Fig: Genotyping results of the PCR amplifications of all predicted larvae WT, Heterozygous**  
791 **and mutant strains within the same population.** (A): Result of *atg7* gene mutation detection. The

792 red box represents the target site of *atg7* gene and the blue arrow represents the actual mutations in  
793 heterozygous by reverse primer. (B): Result of *beclin1* gene mutation detection. The red box  
794 represents the target site and the blue arrow represents the actual mutations in heterozygous by the  
795 forward primer

## 796 2- Supporting tables legends

797 **S1Table: Primers used in qRT-PCR (Expression of autophagy-related genes).**

798 **S2 Table: Primers used in qRT-PCR (Expression of genes involved in glycogen  
799 metabolism).**

800 **S3 Table: Primers used in qRT-PCR (Expression of genes involved in lipid metabolism).**

801 **S4Table: Primers used in cDNA amplification for probe synthesis (WISH).**

802 **S5Table: Primer sequences of *atg7* and *beclin1* gRNA template used in our zebrafish  
803 model.**

804

805

806

807

808

809

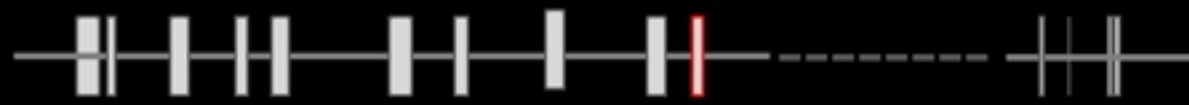

<https://doi.org/10.1101/666883>

CC-BY 4.0 International license

GCTTCACAGCTGGATGTTGTGG

GCTTCACAGCTGGA

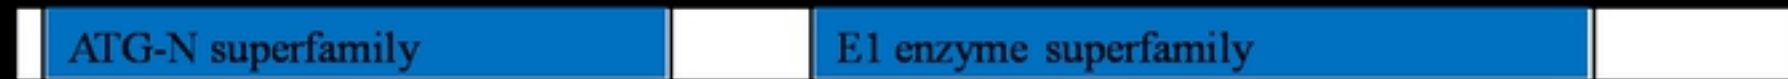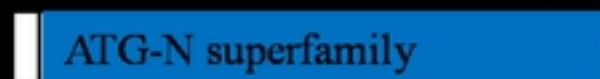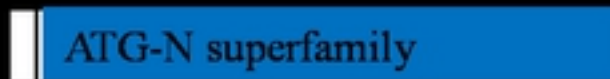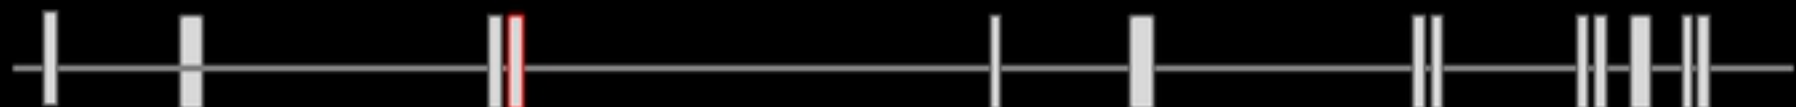

GGAGAACAAACAAGATGGCGTGG

GGAGAACAAACAAG G

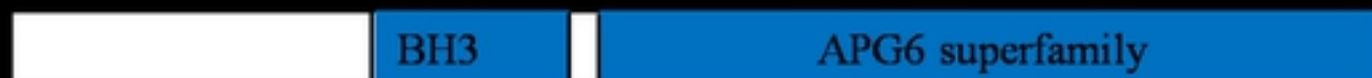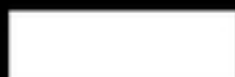

Figure



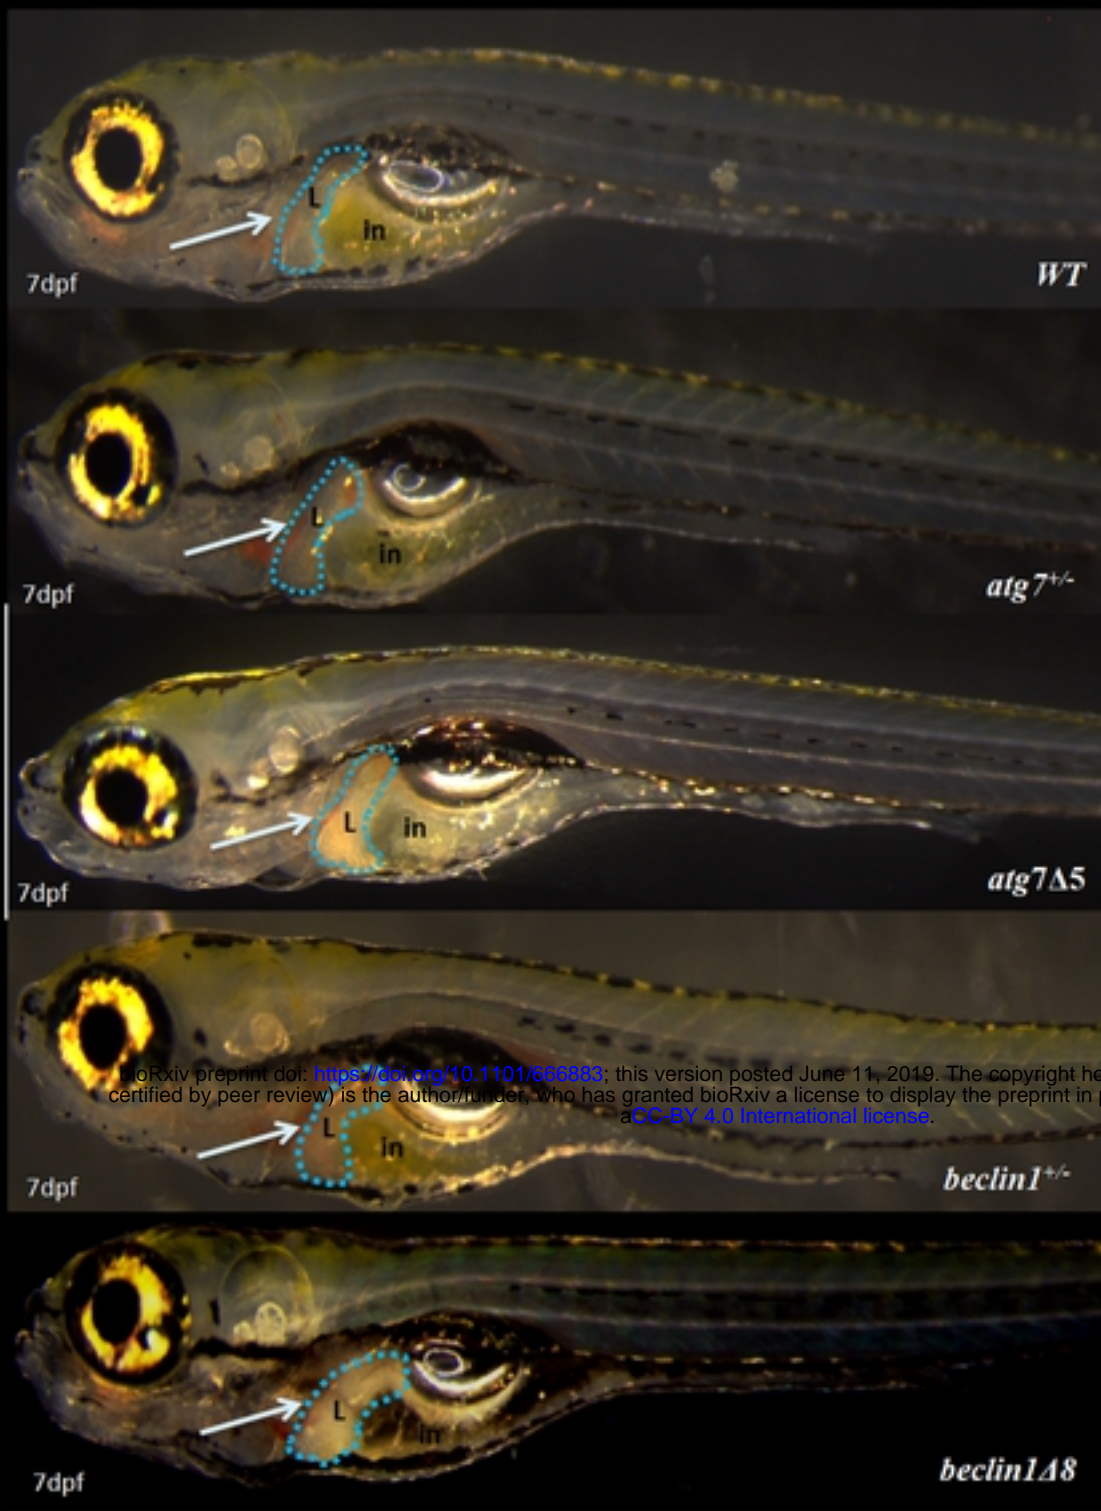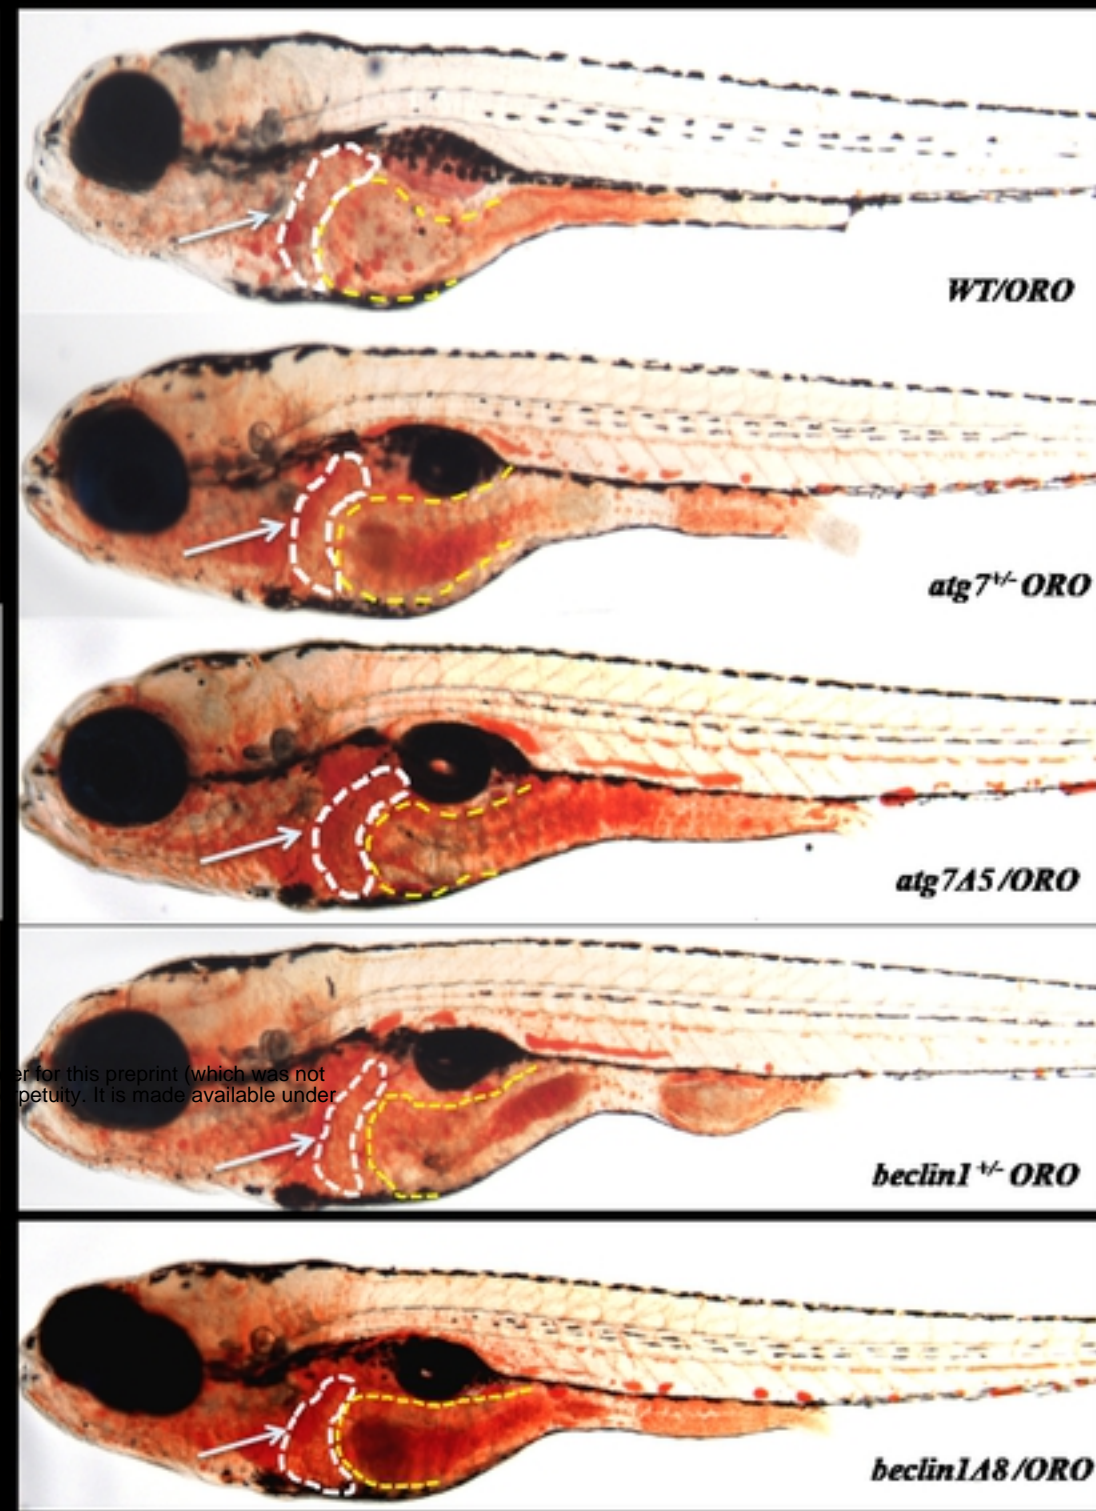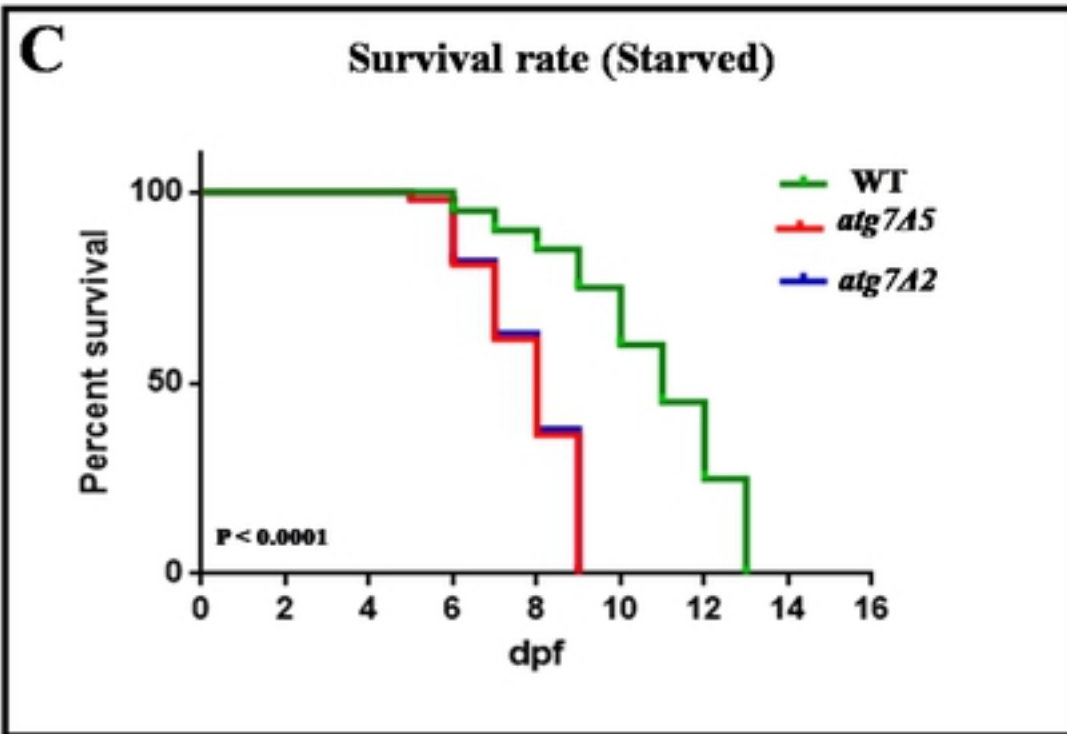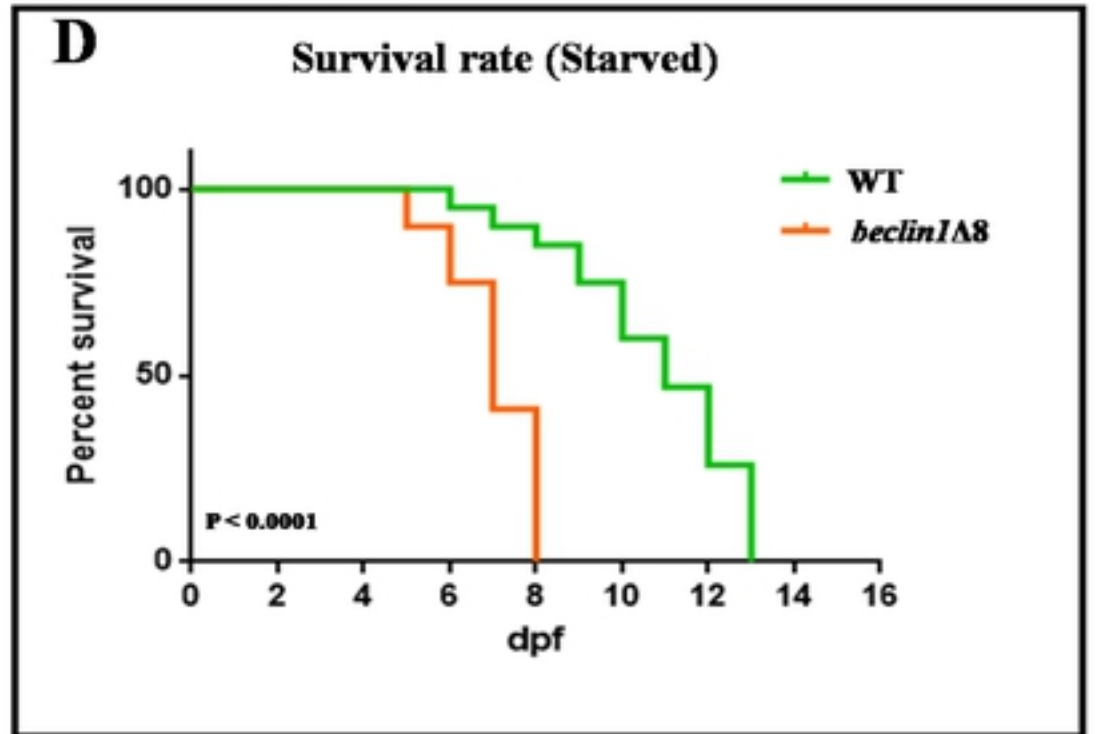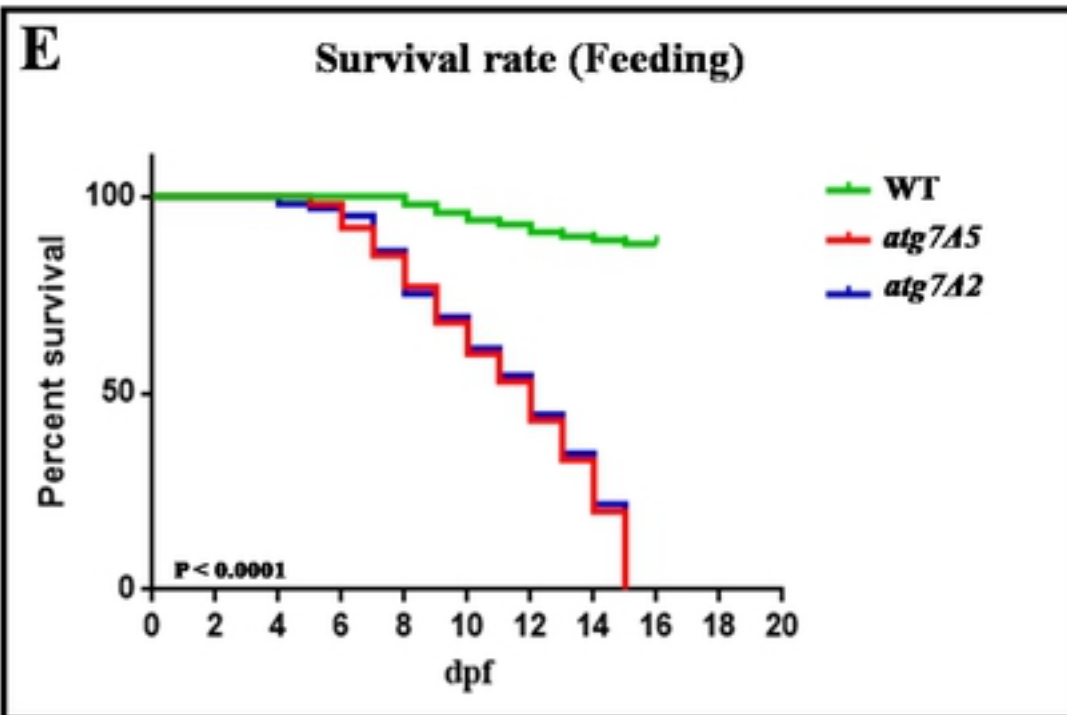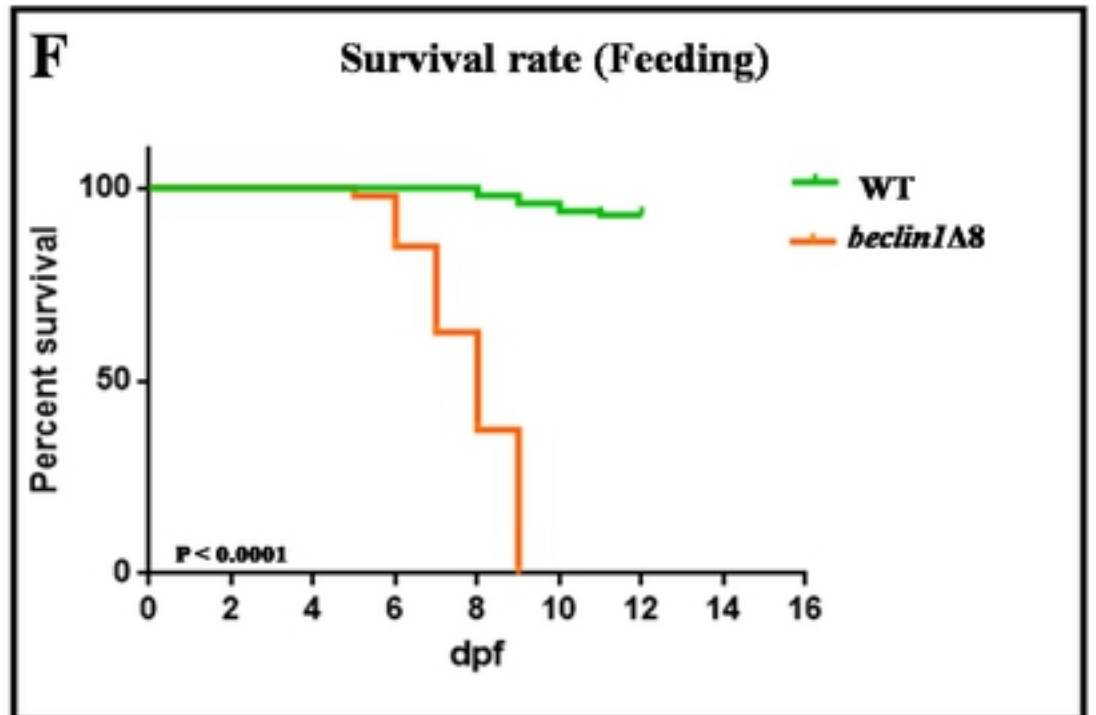

Figure



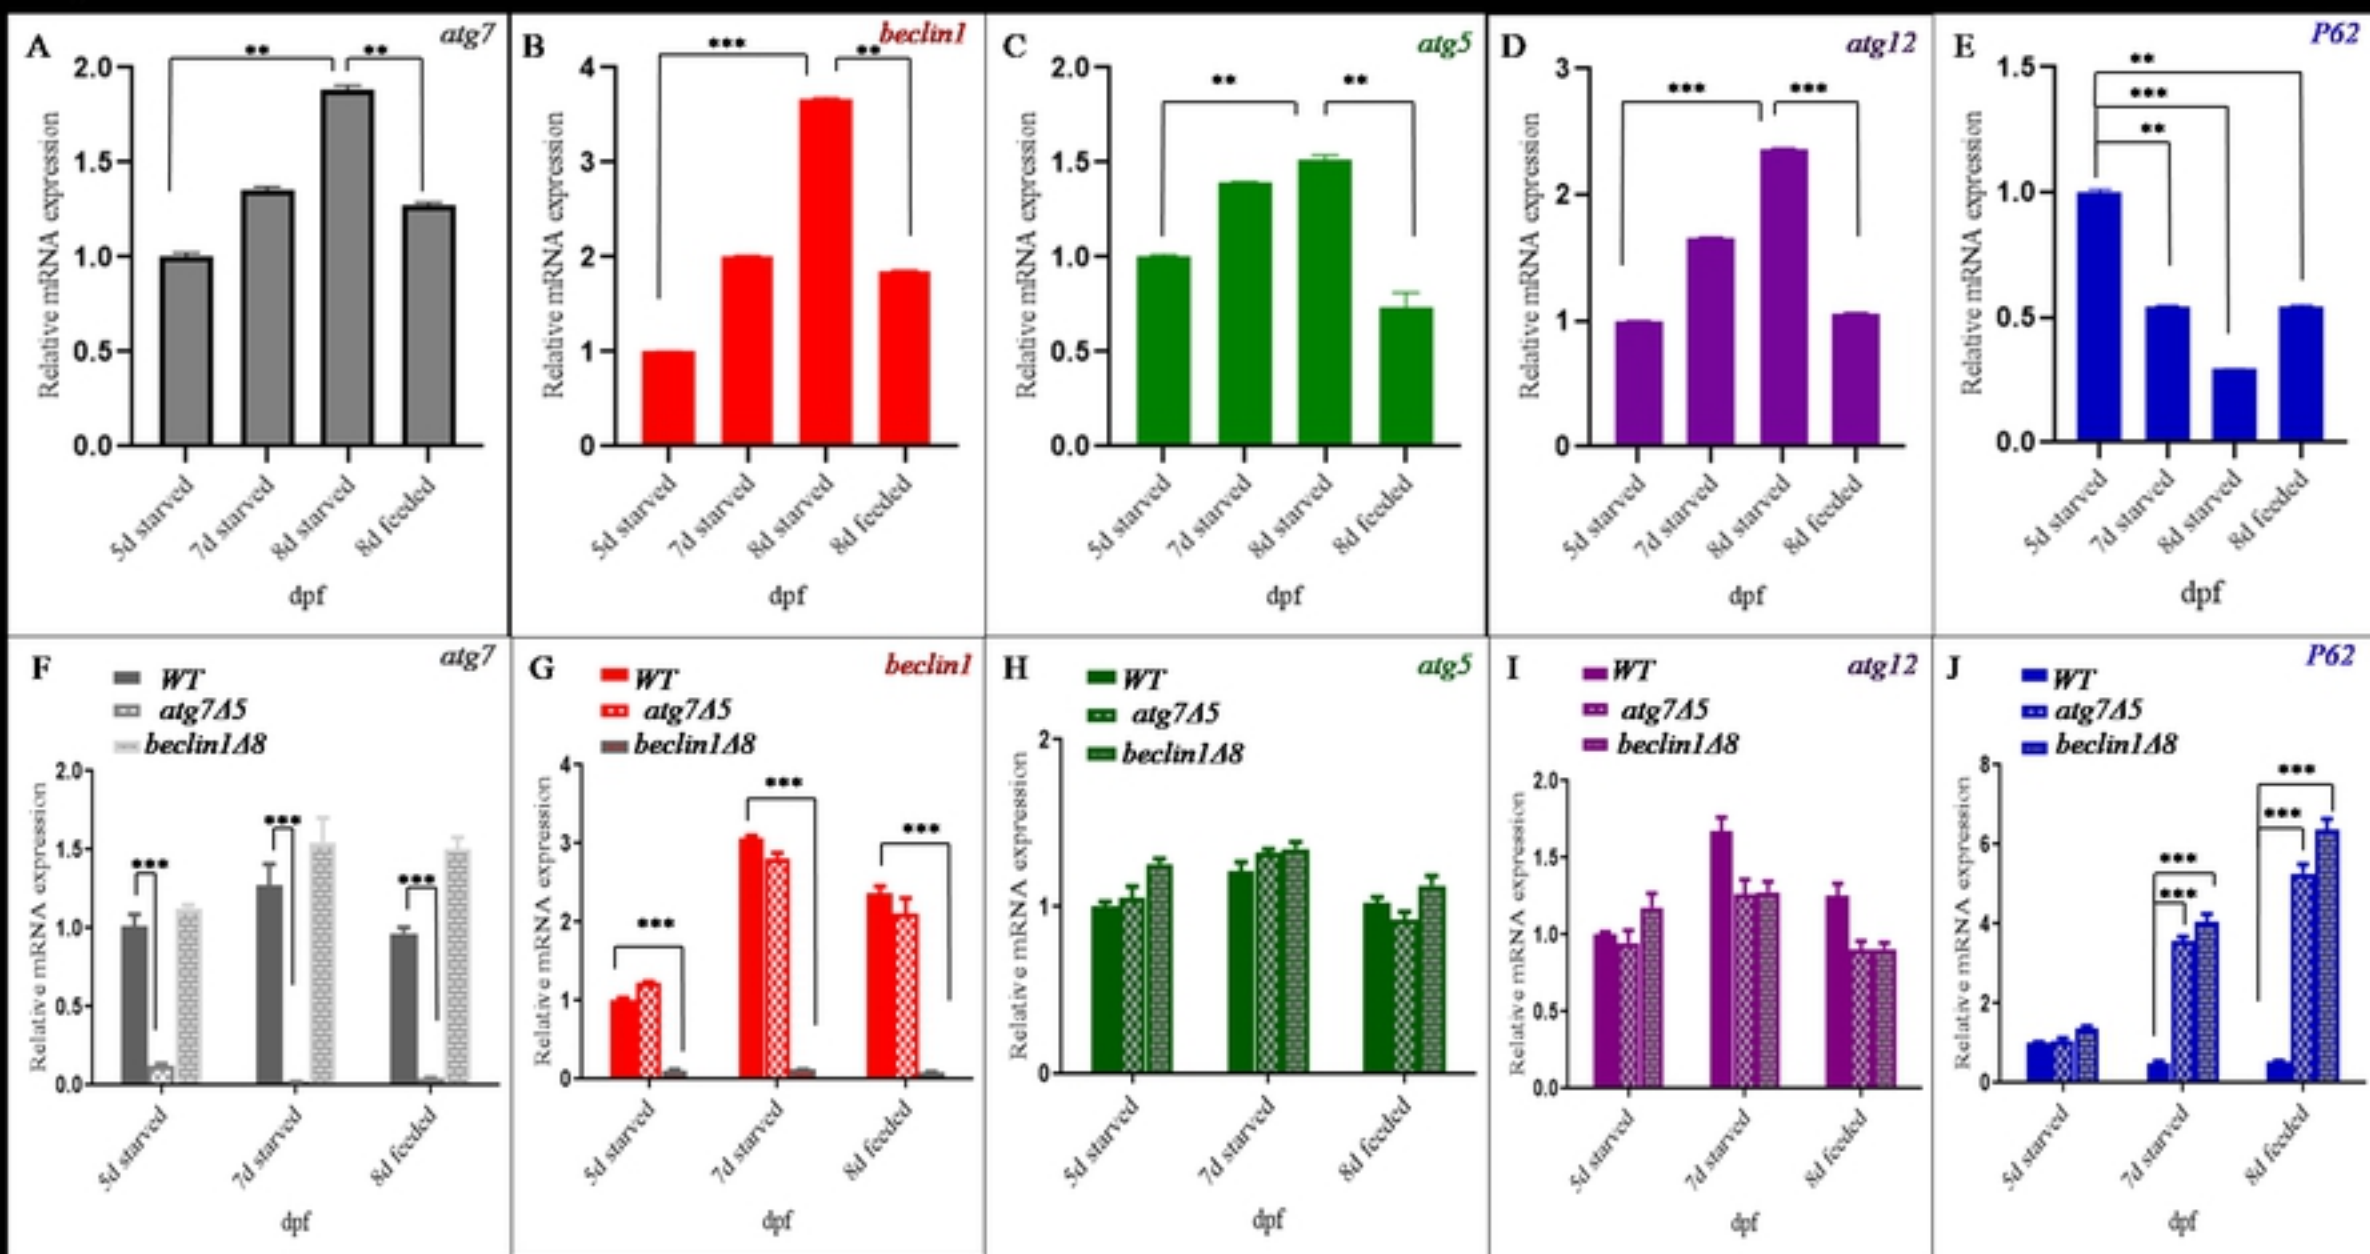

Figure

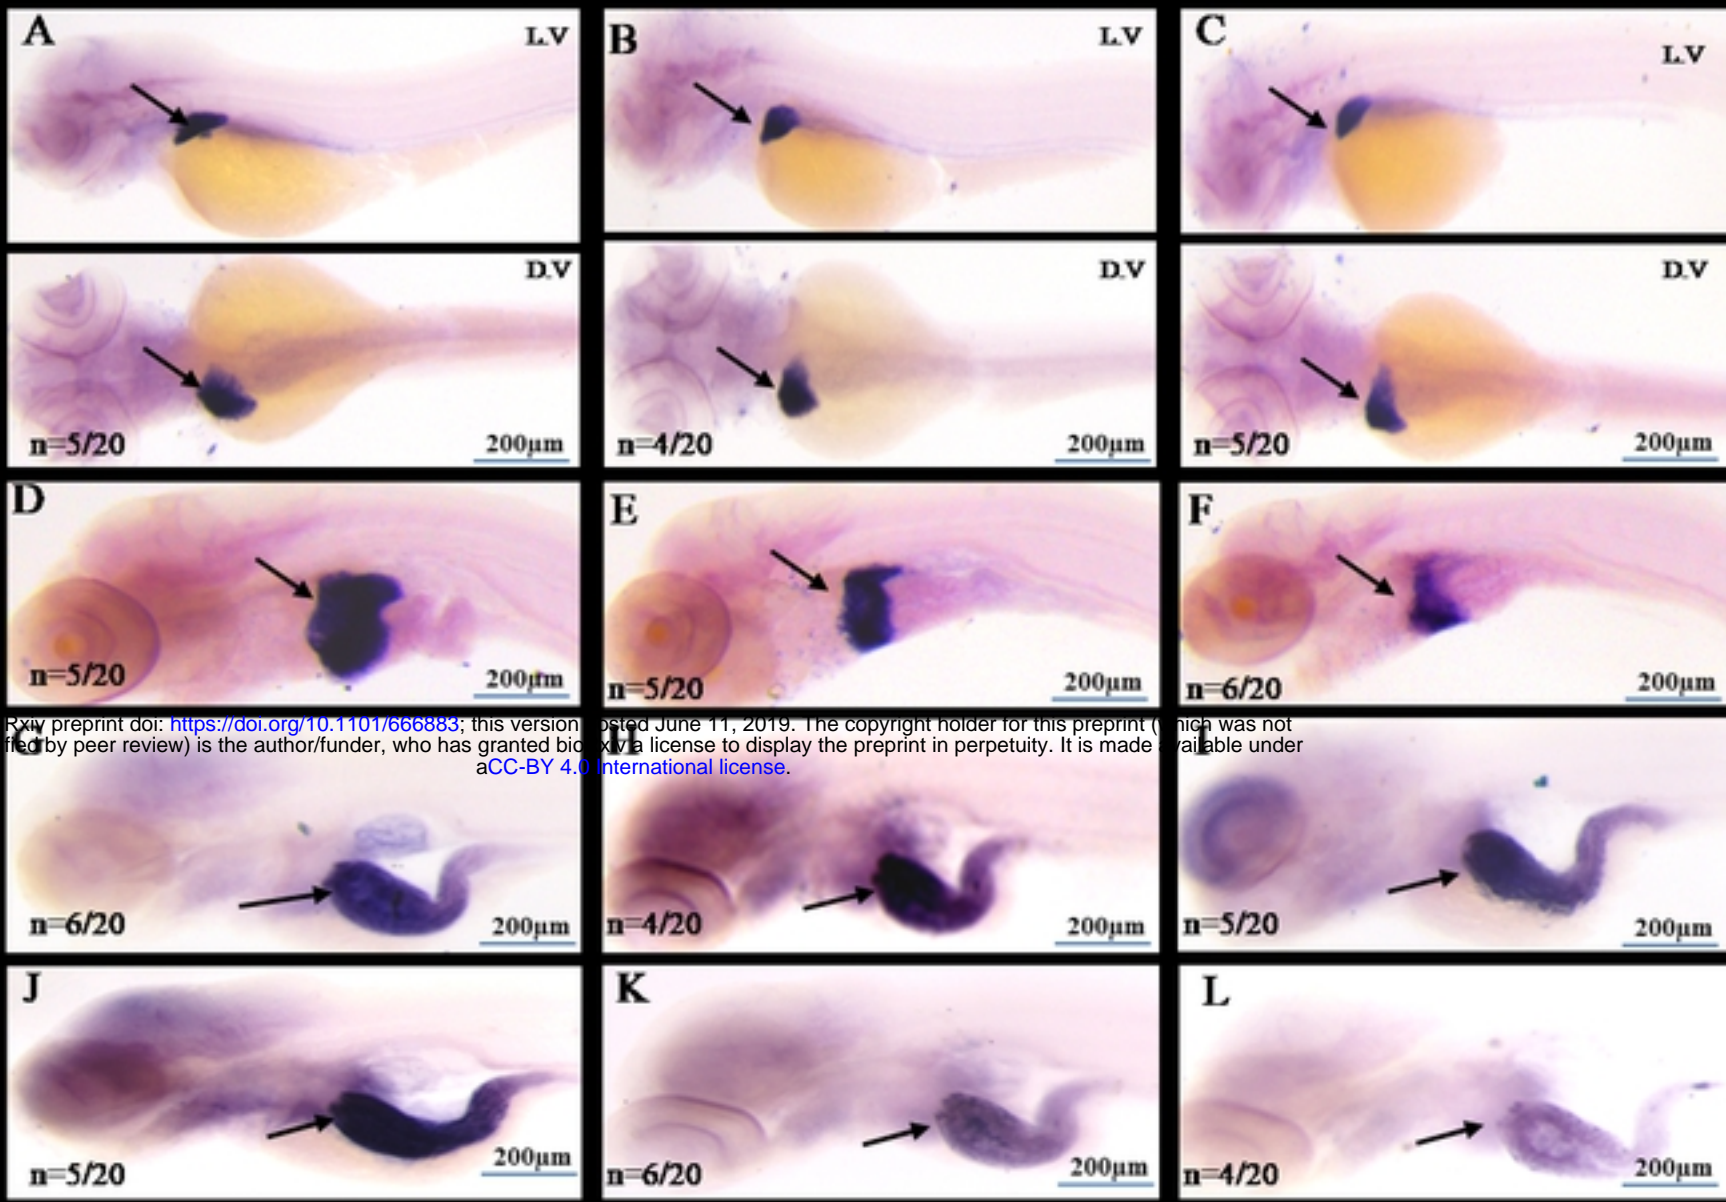

bioRxiv preprint doi: <https://doi.org/10.1101/666883>; this version posted June 11, 2019. The copyright holder for this preprint (which was not certified by peer review) is the author/funder, who has granted bioRxiv a license to display the preprint in perpetuity. It is made available under aCC-BY 4.0 International license.

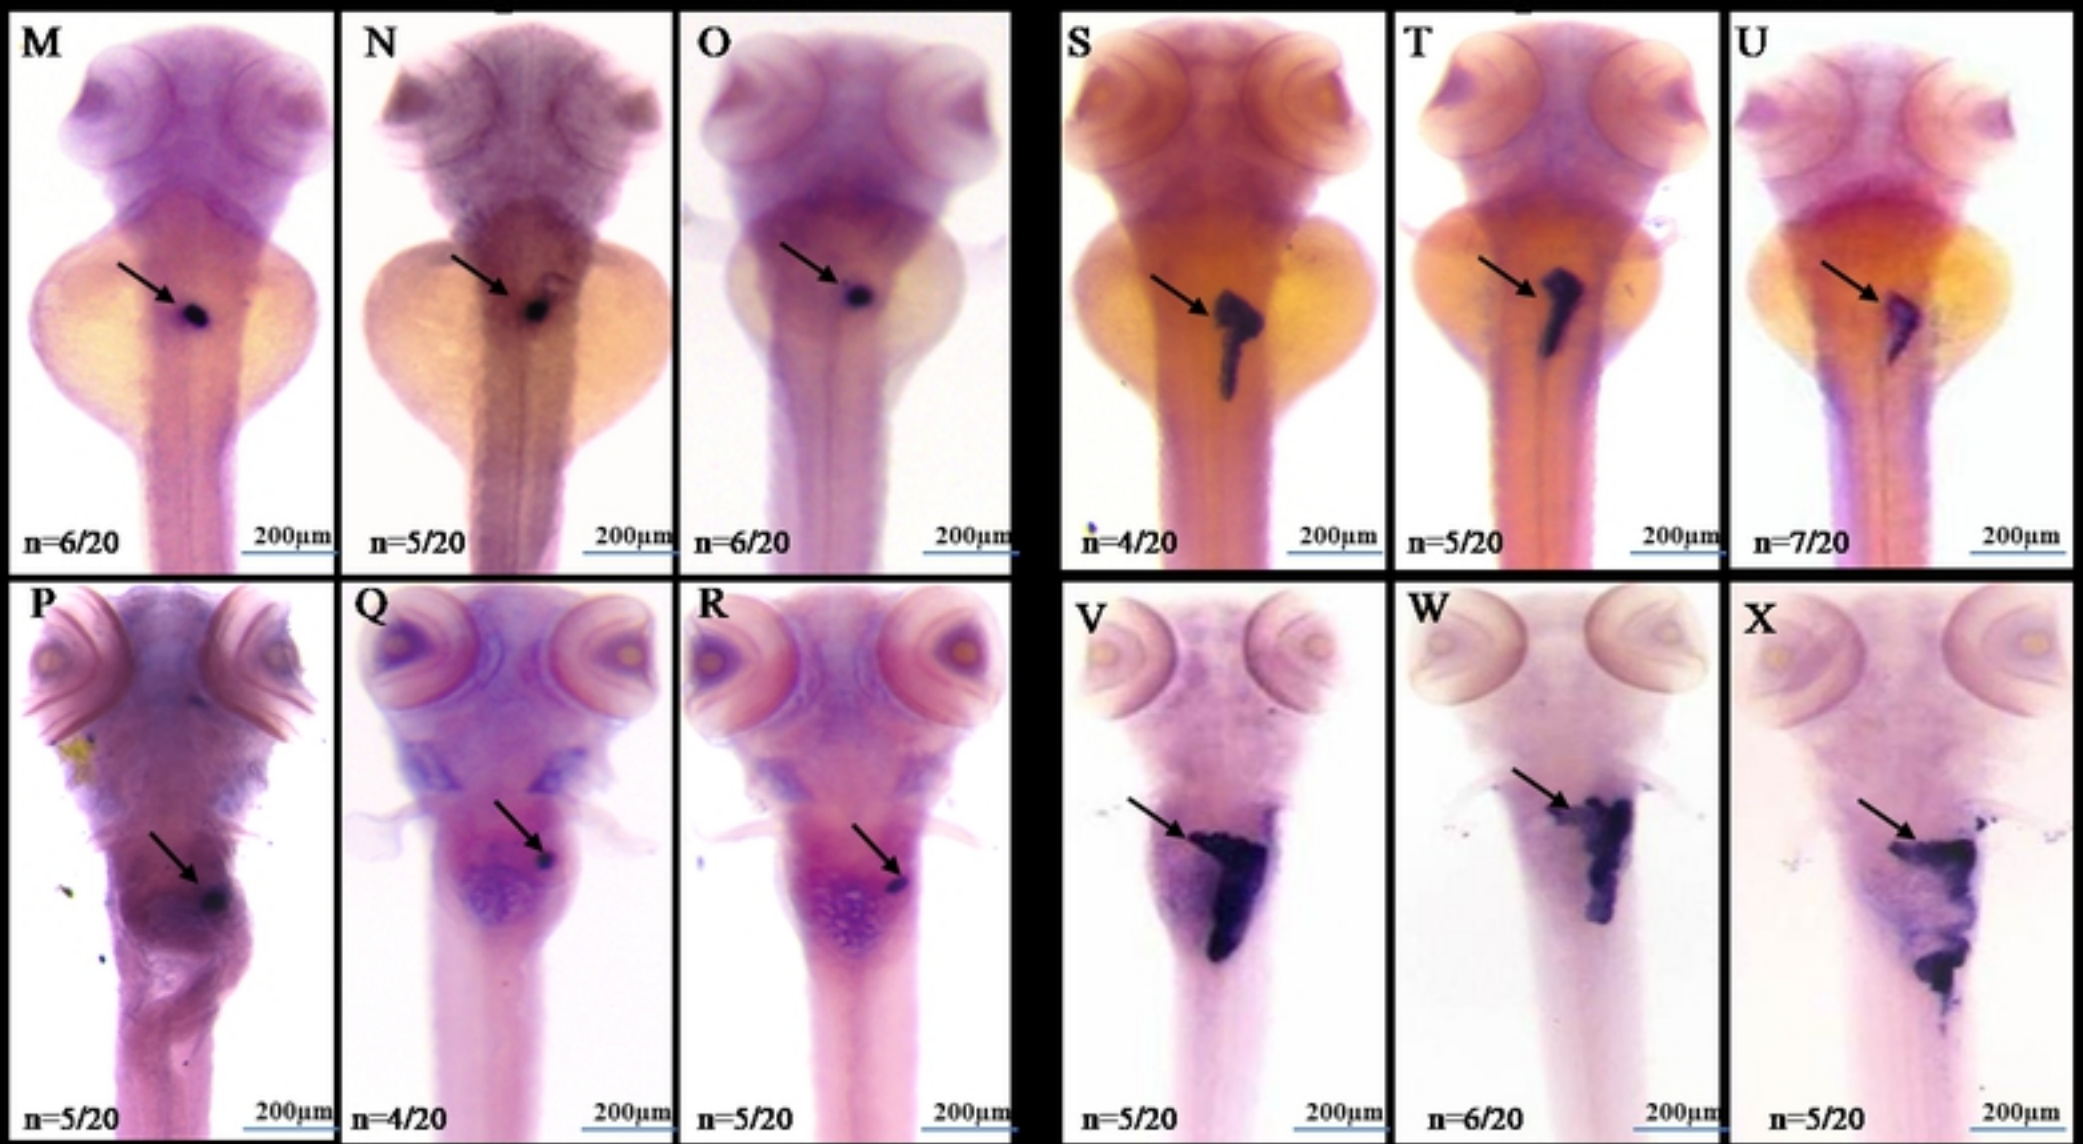

Figure



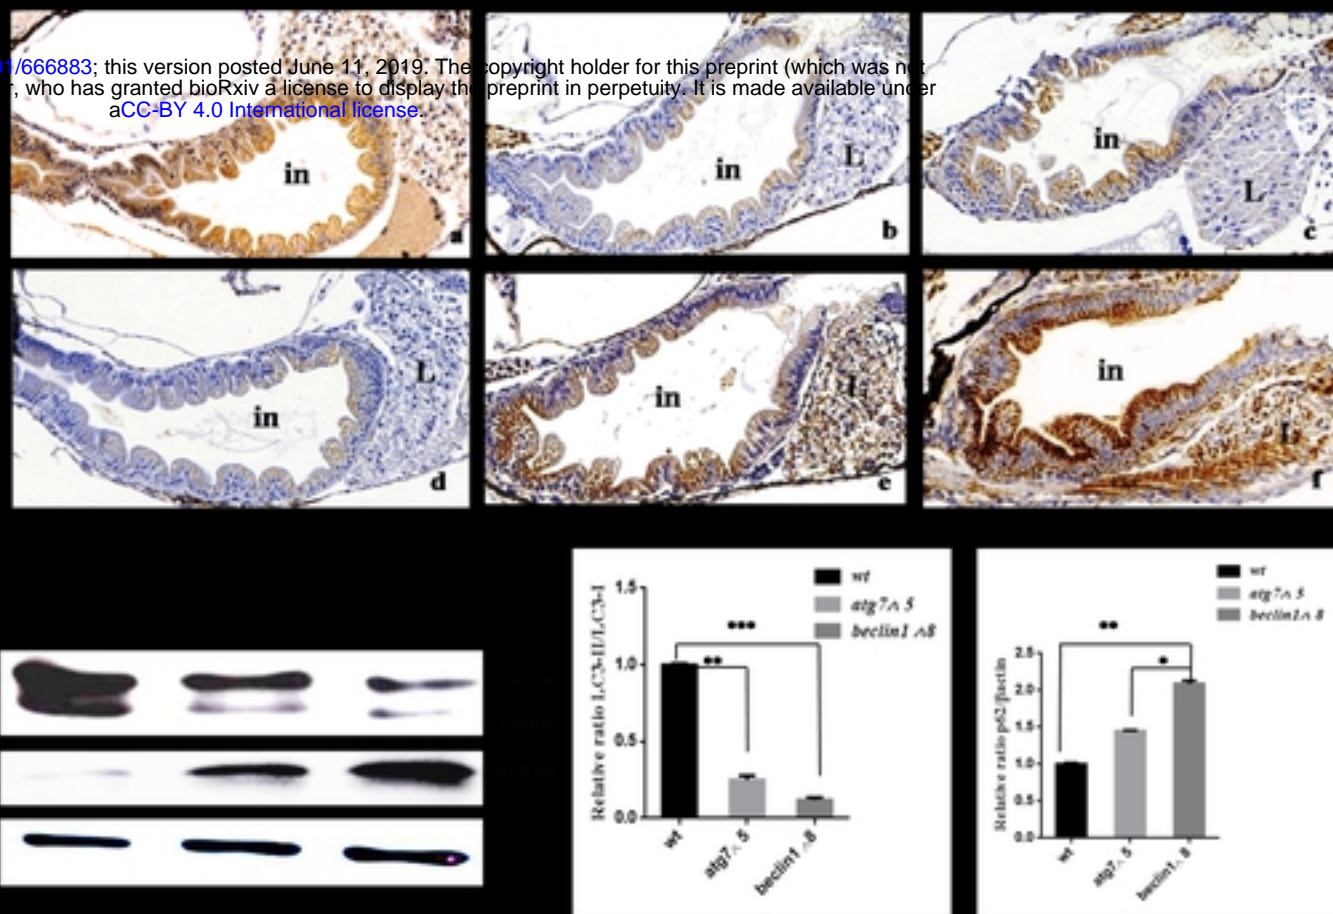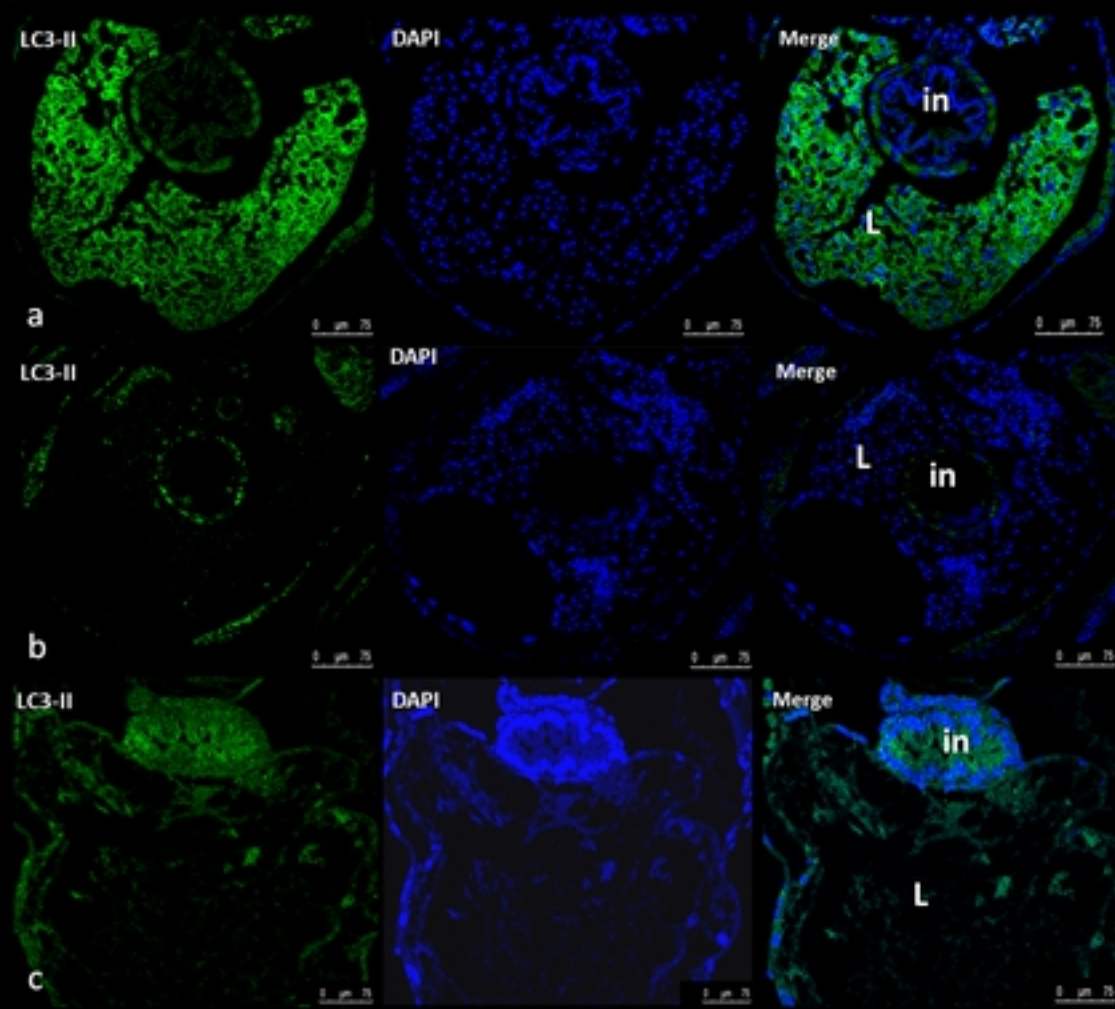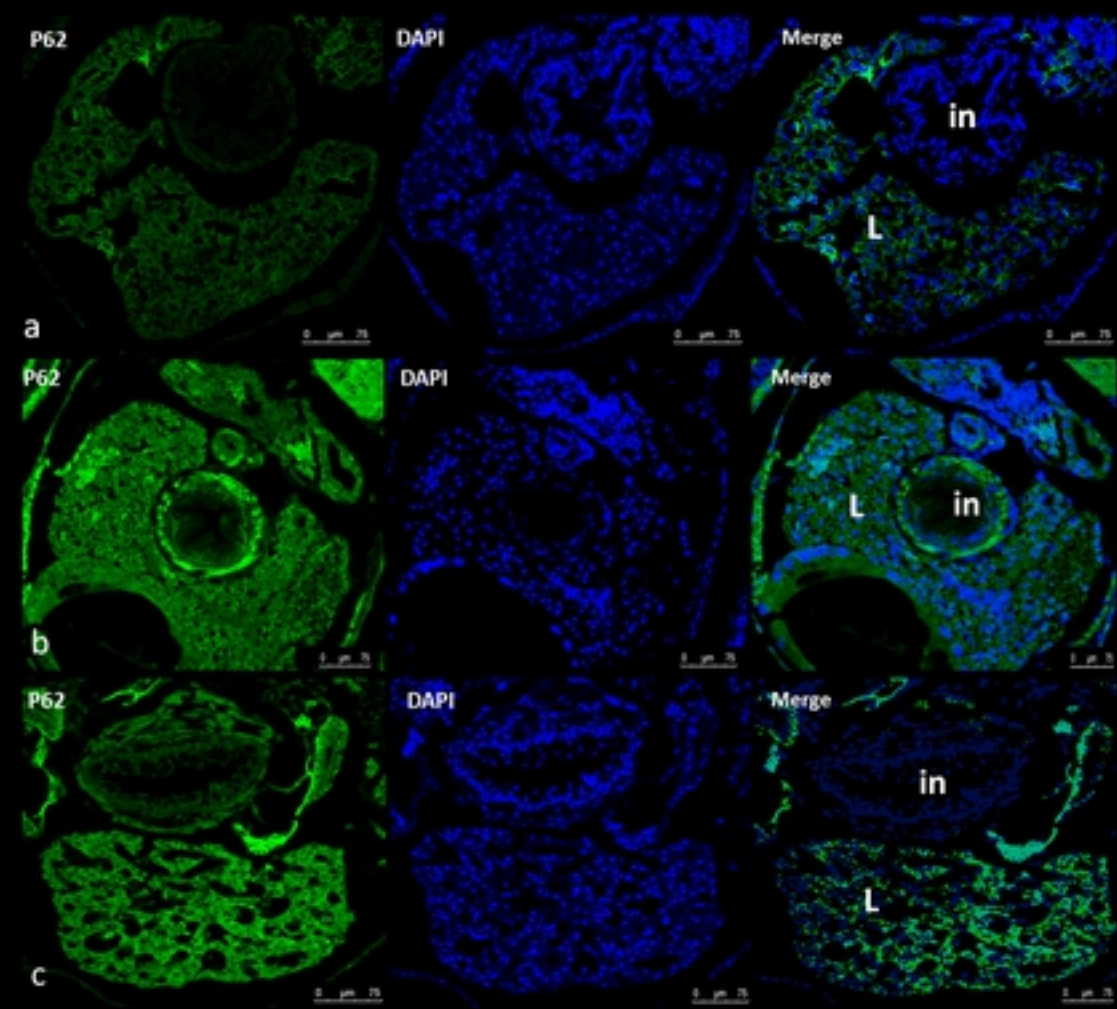



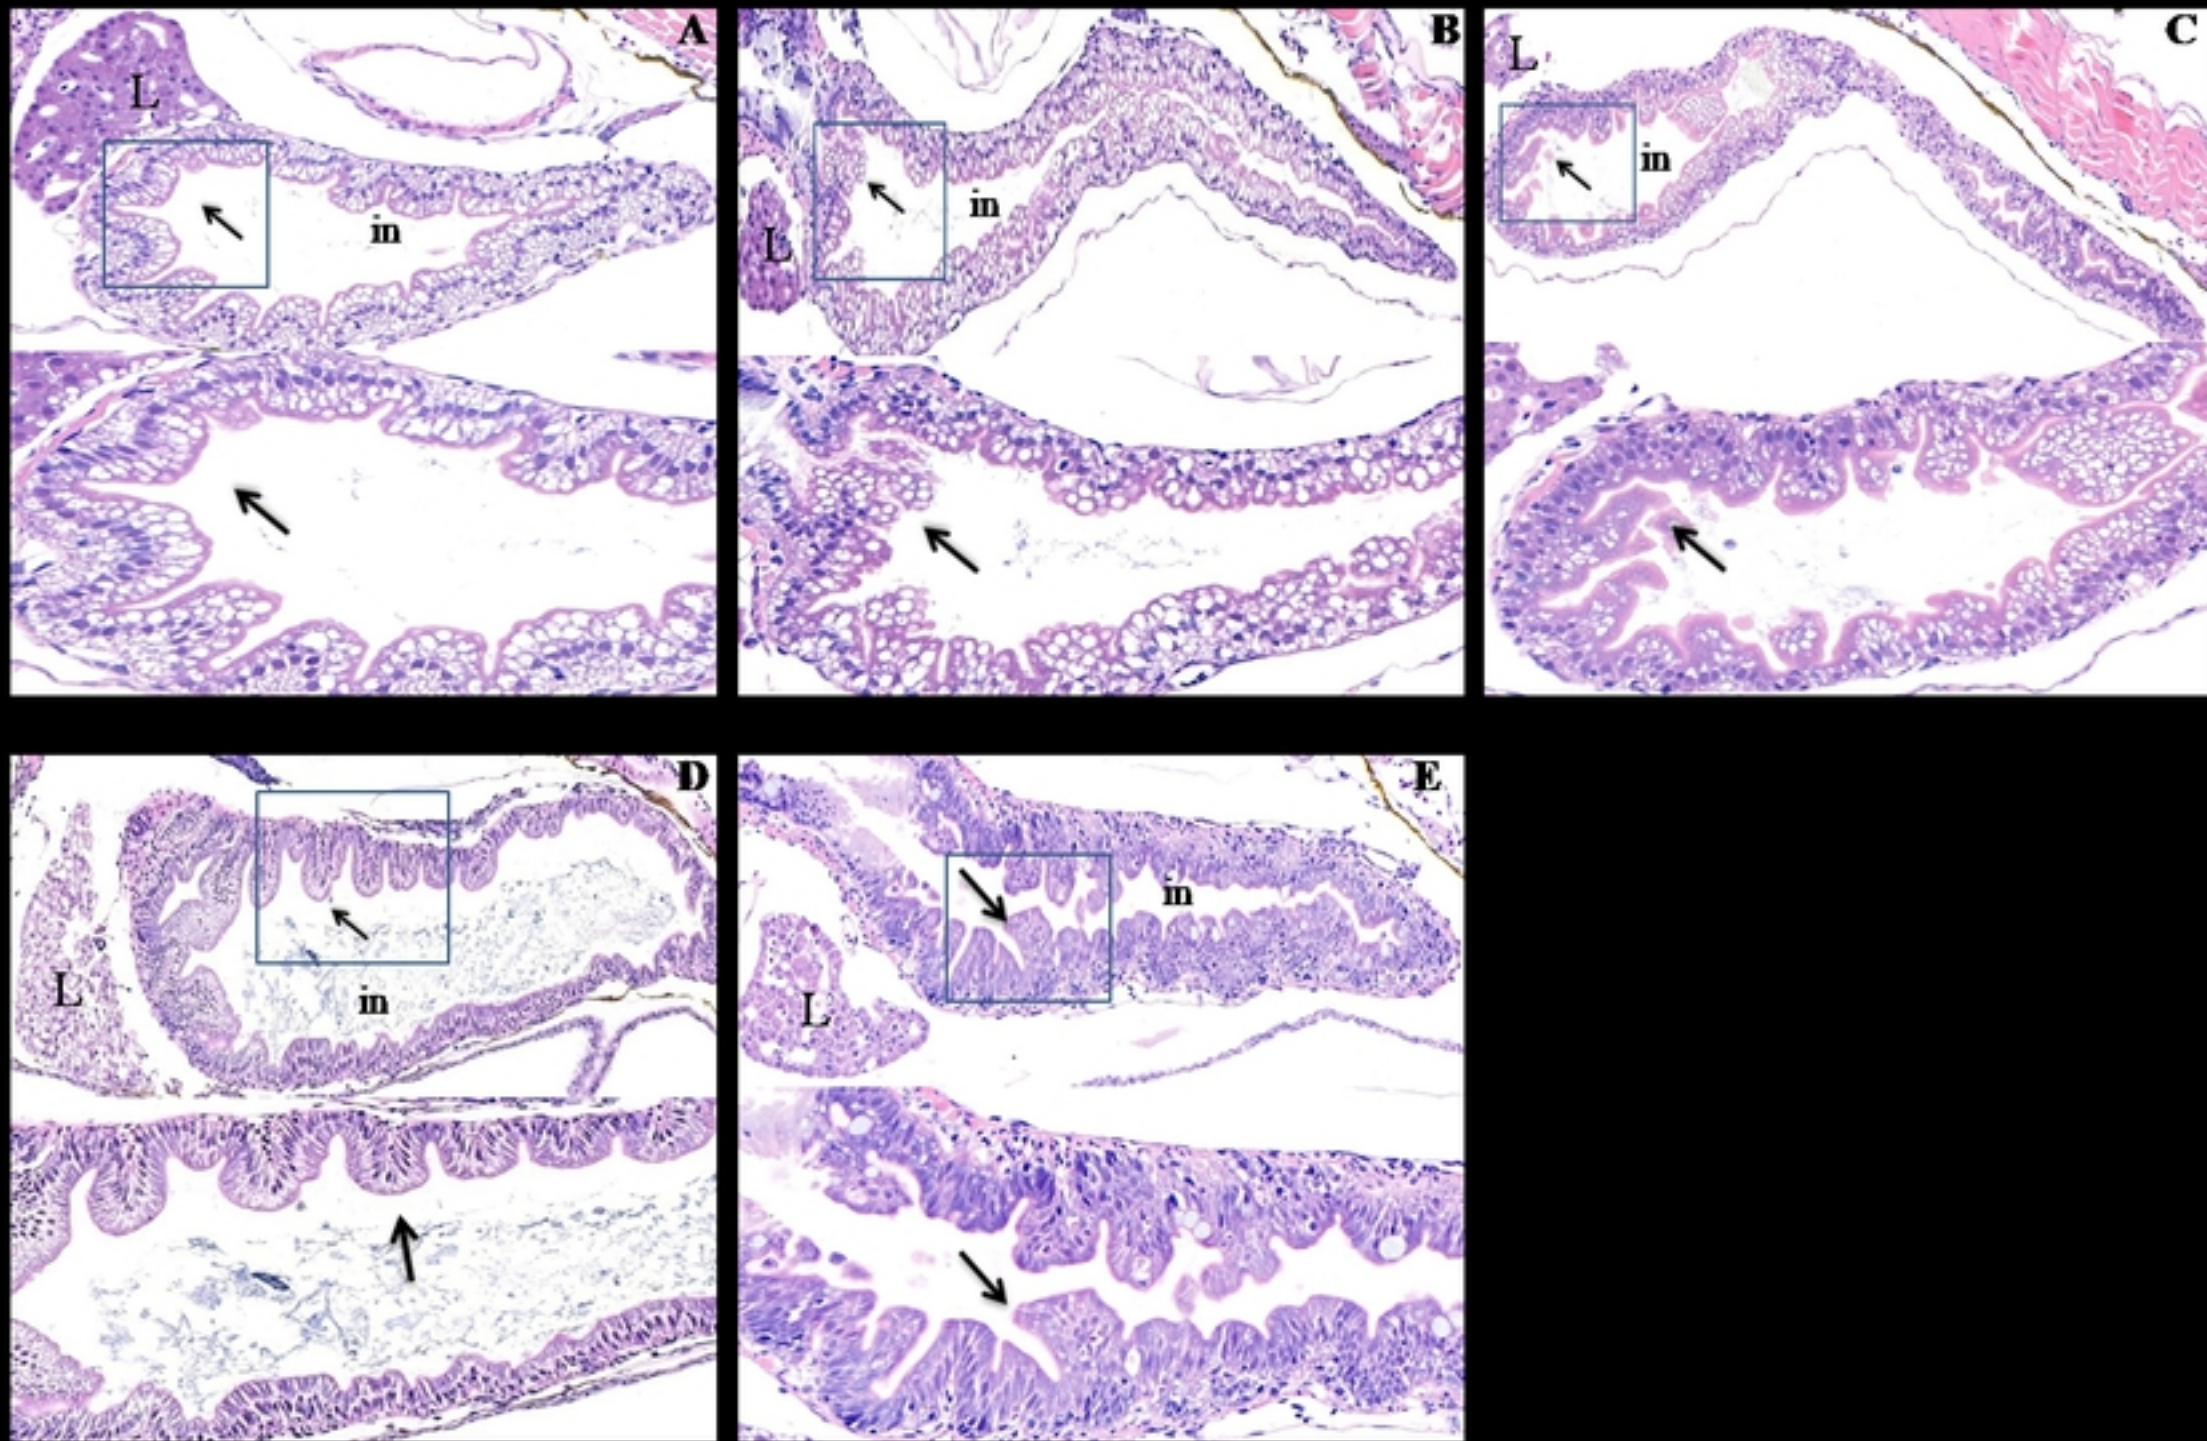

Figure



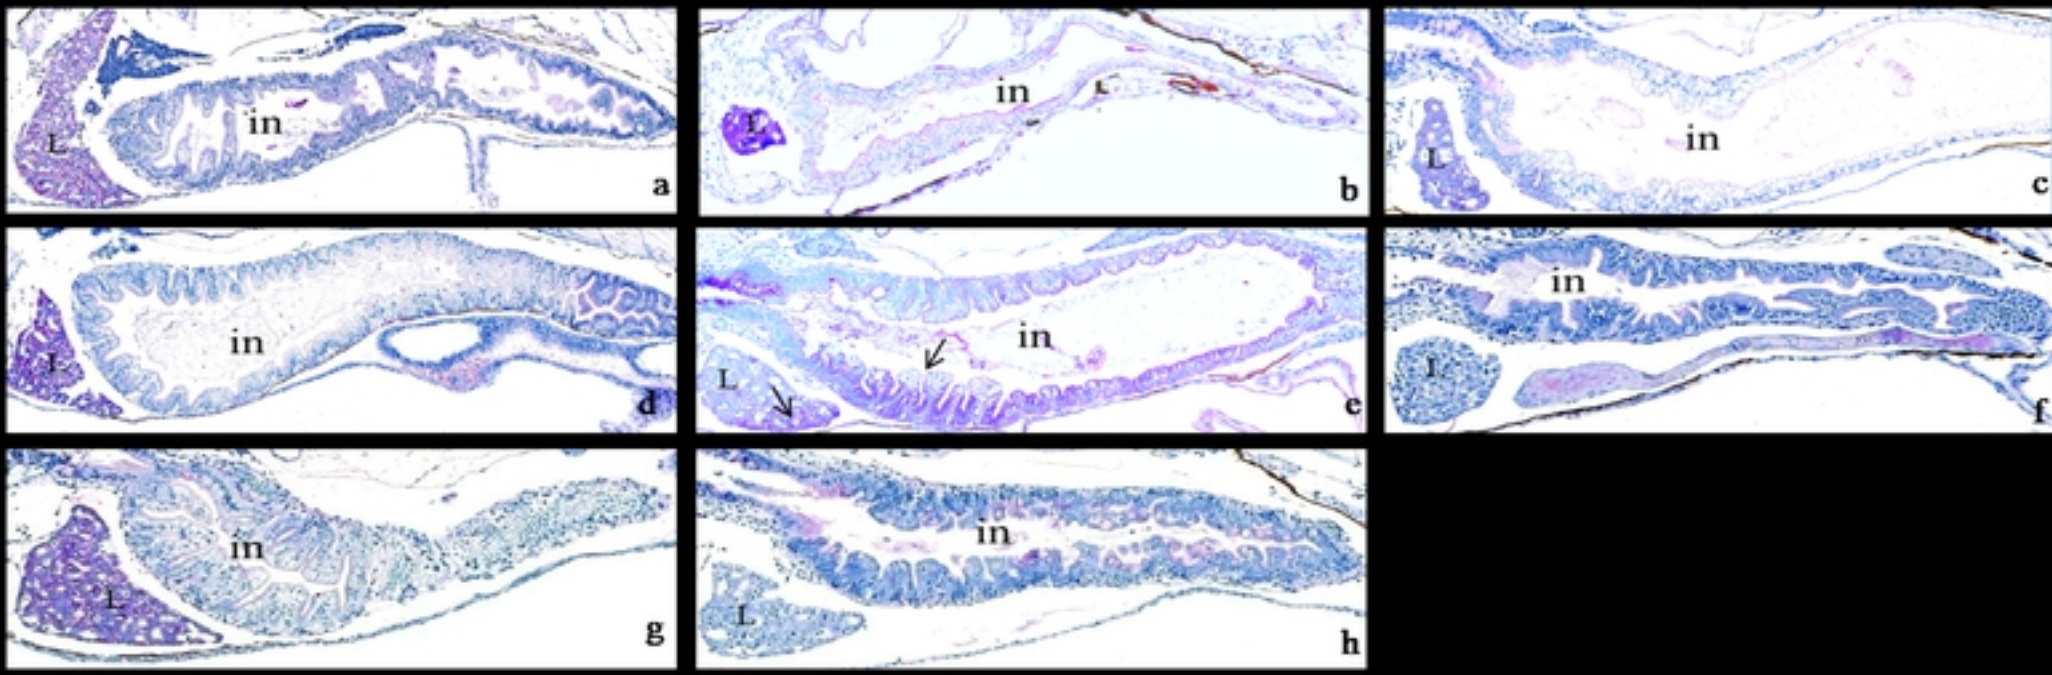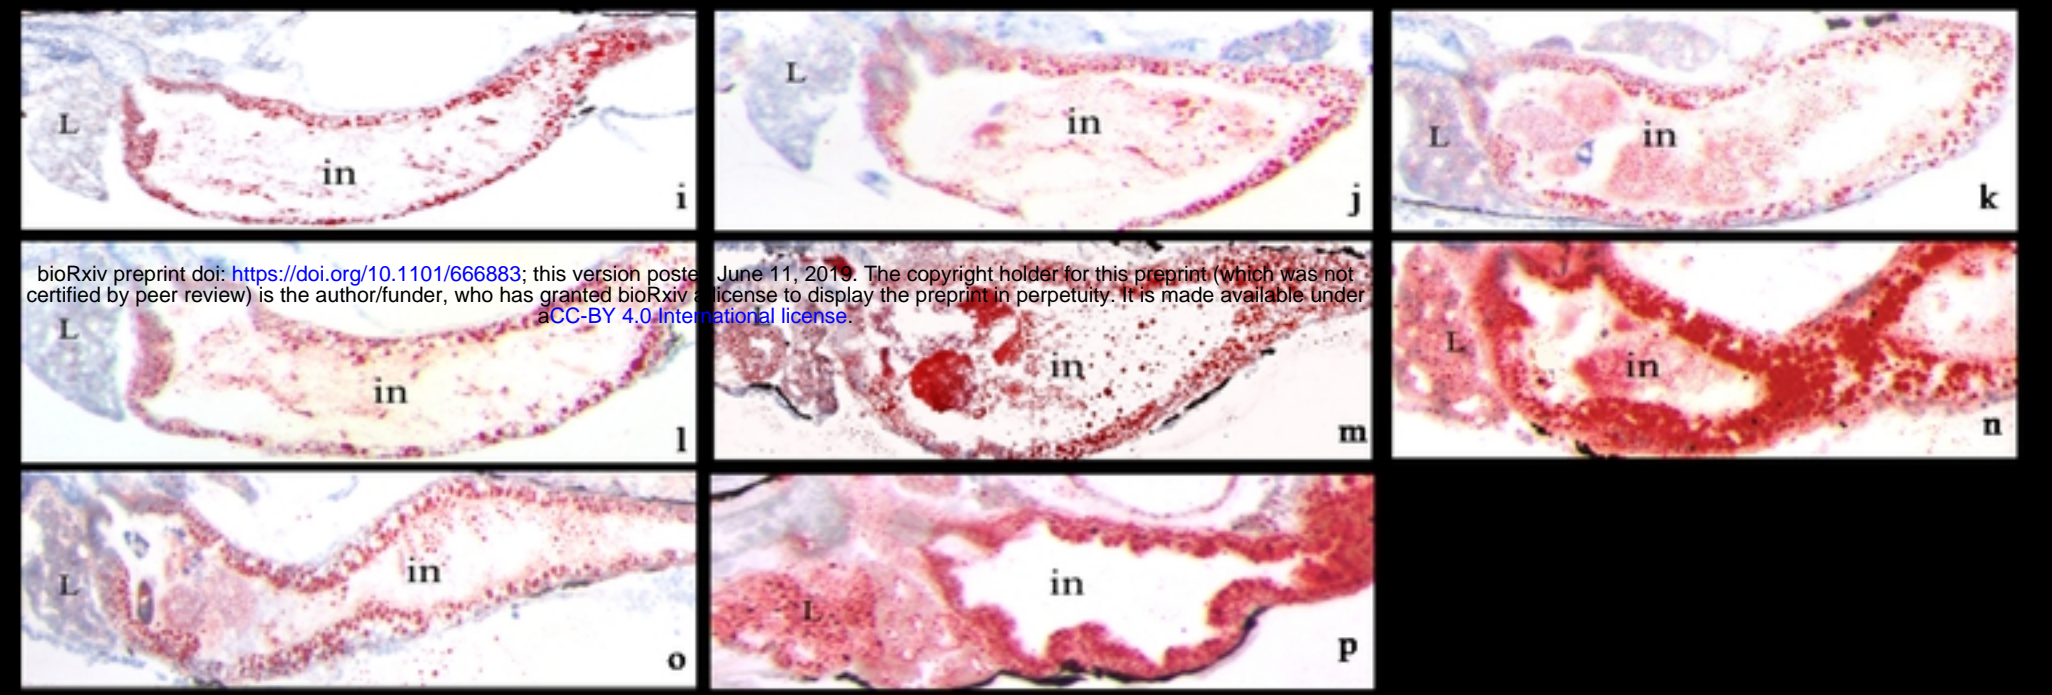

bioRxiv preprint doi: <https://doi.org/10.1101/666883>; this version posted June 11, 2019. The copyright holder for this preprint (which was not certified by peer review) is the author/funder, who has granted bioRxiv a license to display the preprint in perpetuity. It is made available under aCC-BY 4.0 International license.

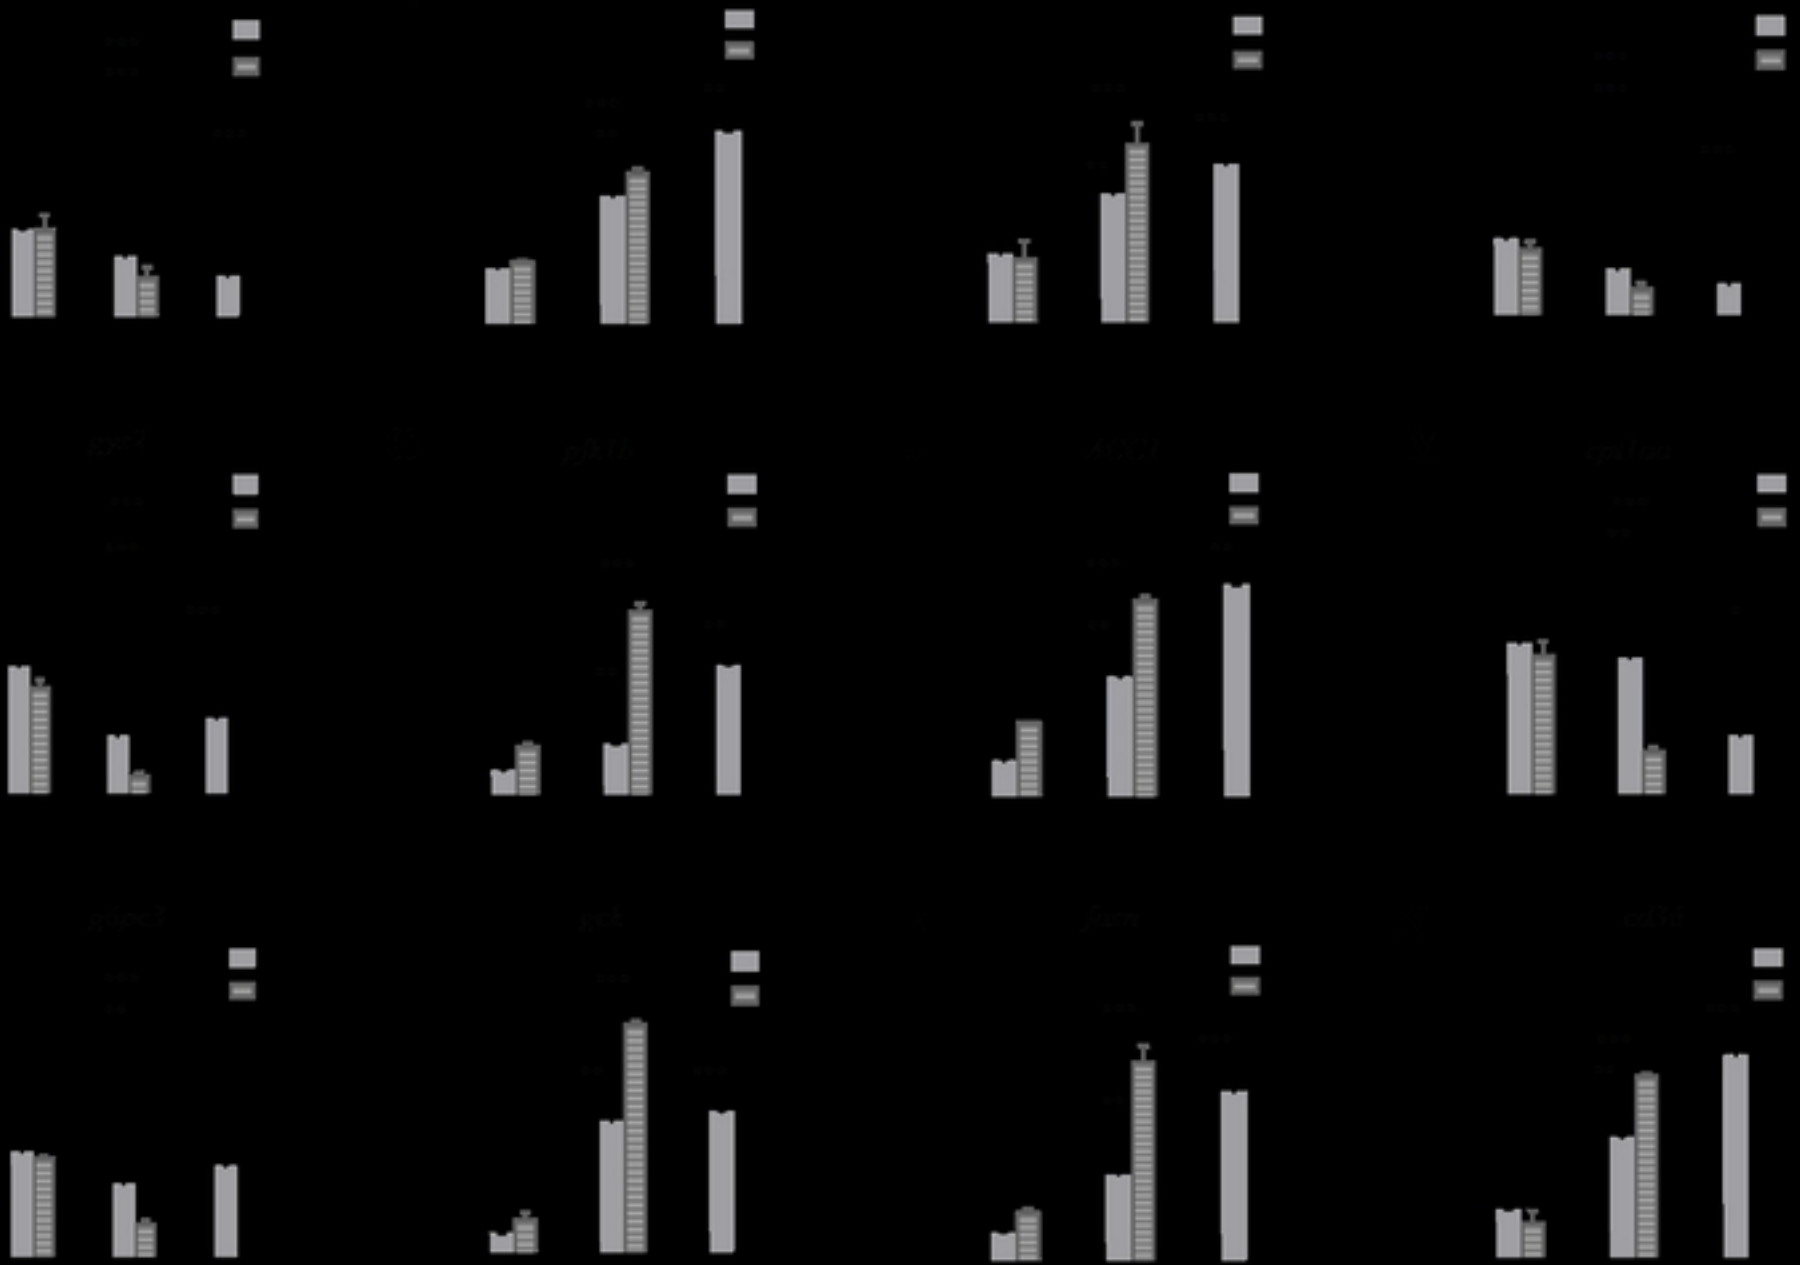

Figure



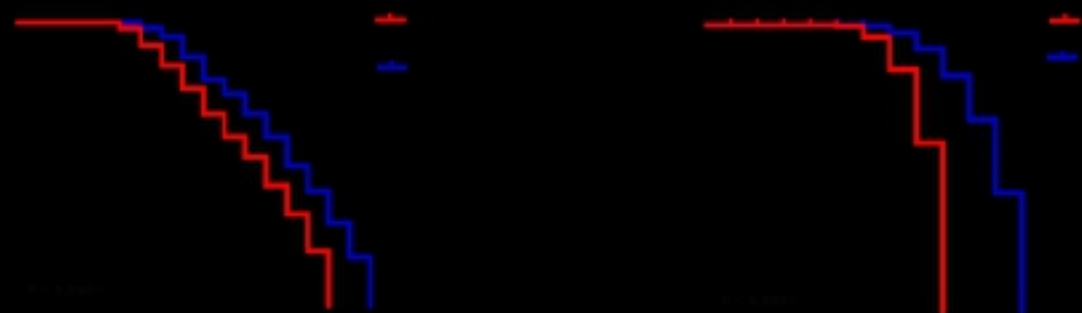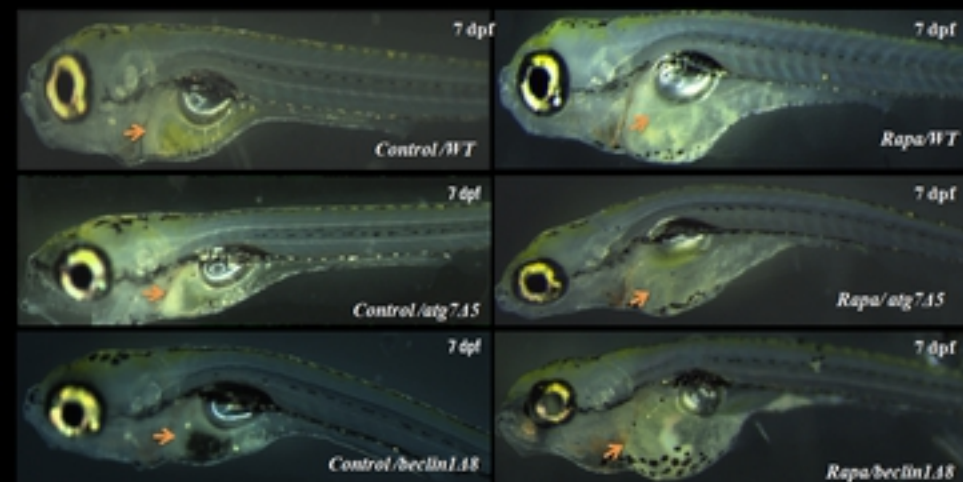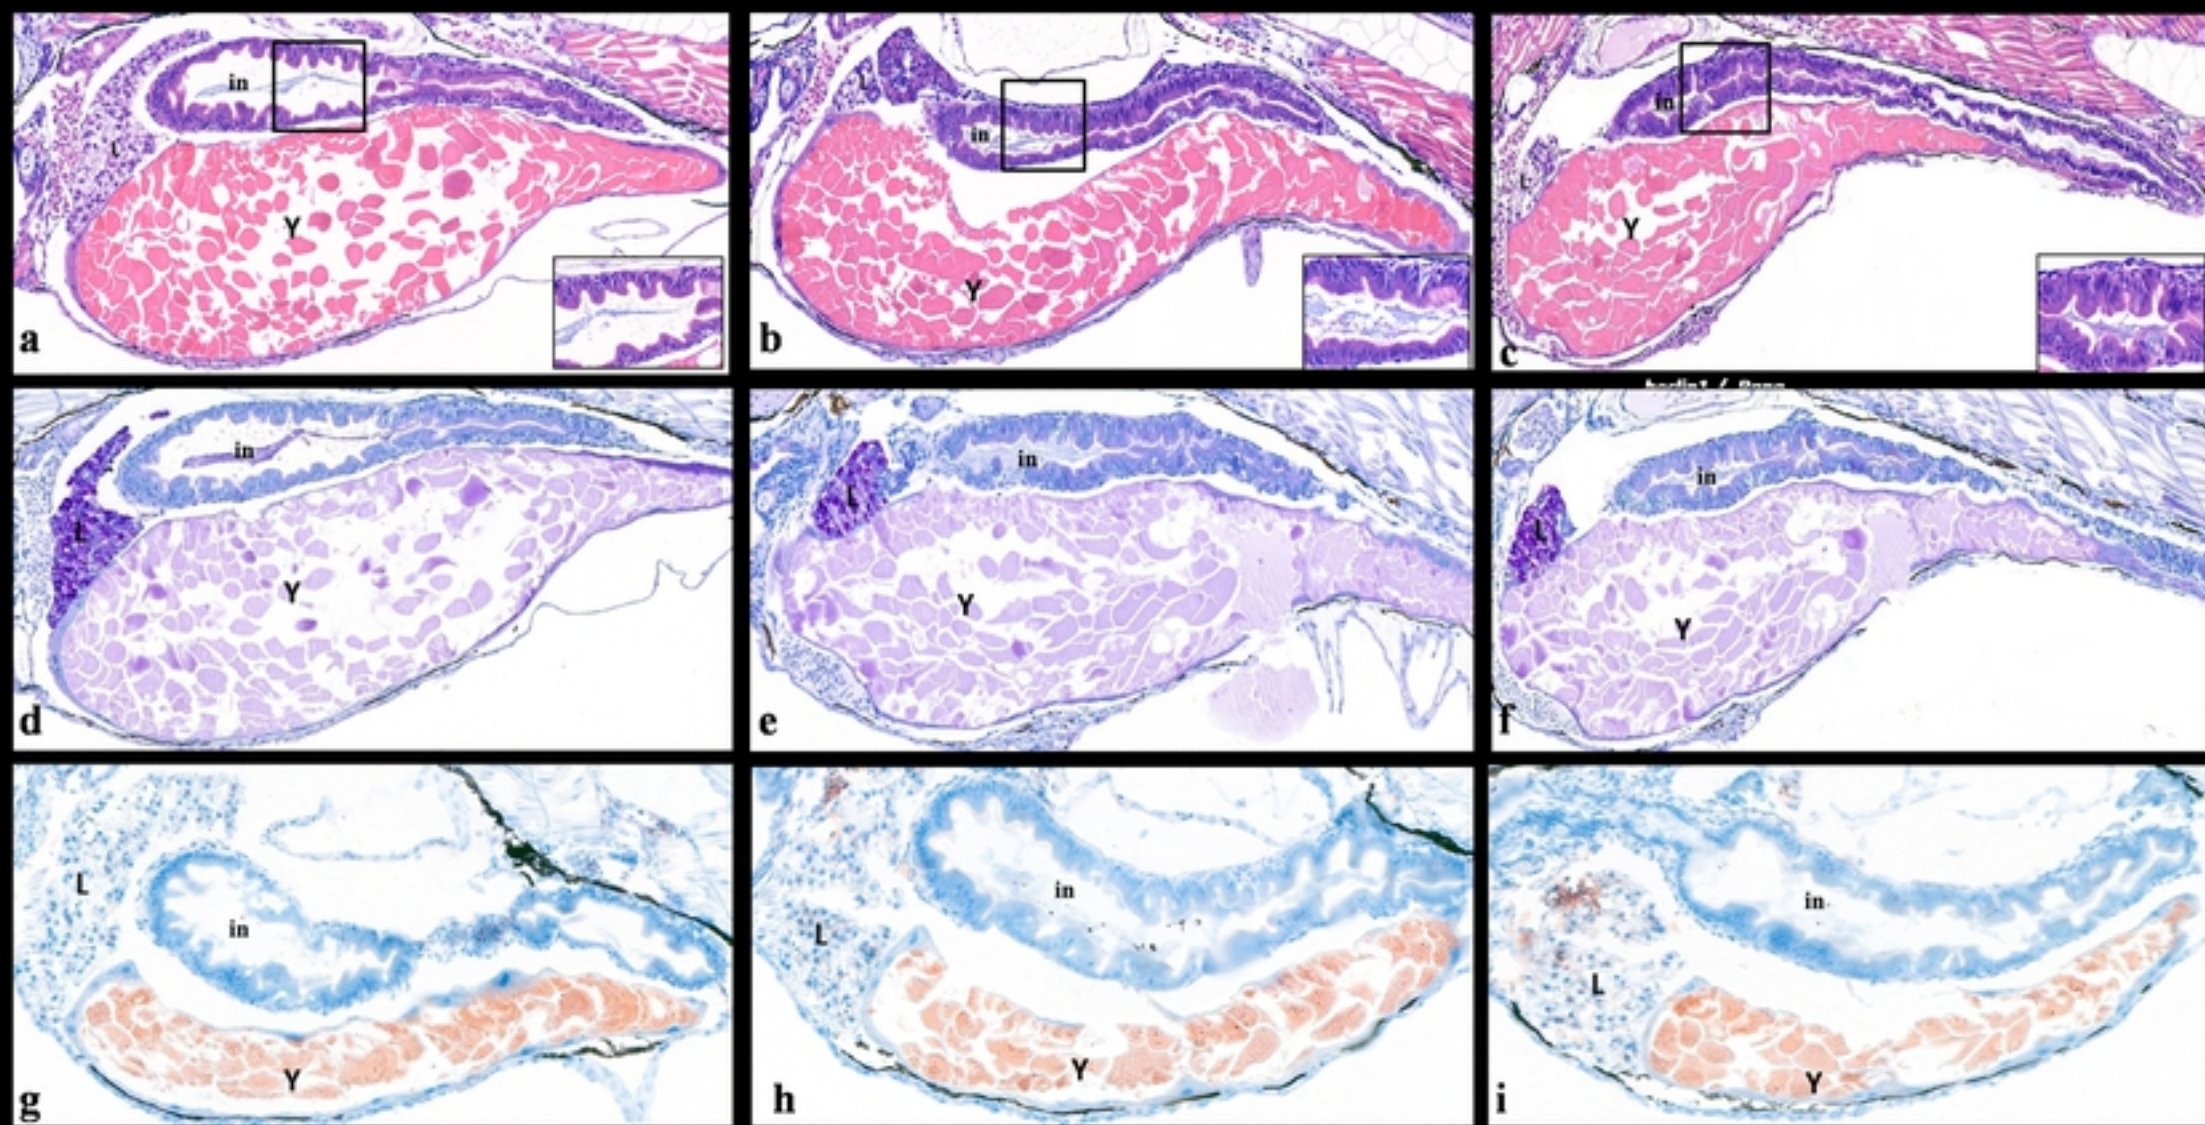

Figure



<https://doi.org/10.1101/666883>; this version posted June 11, 2019. The copyright holder for this preprint (which was not certified by peer review) is the author/funder, who has granted bioRxiv a license to display the preprint in perpetuity. It is made available under aCC-BY 4.0 International license.

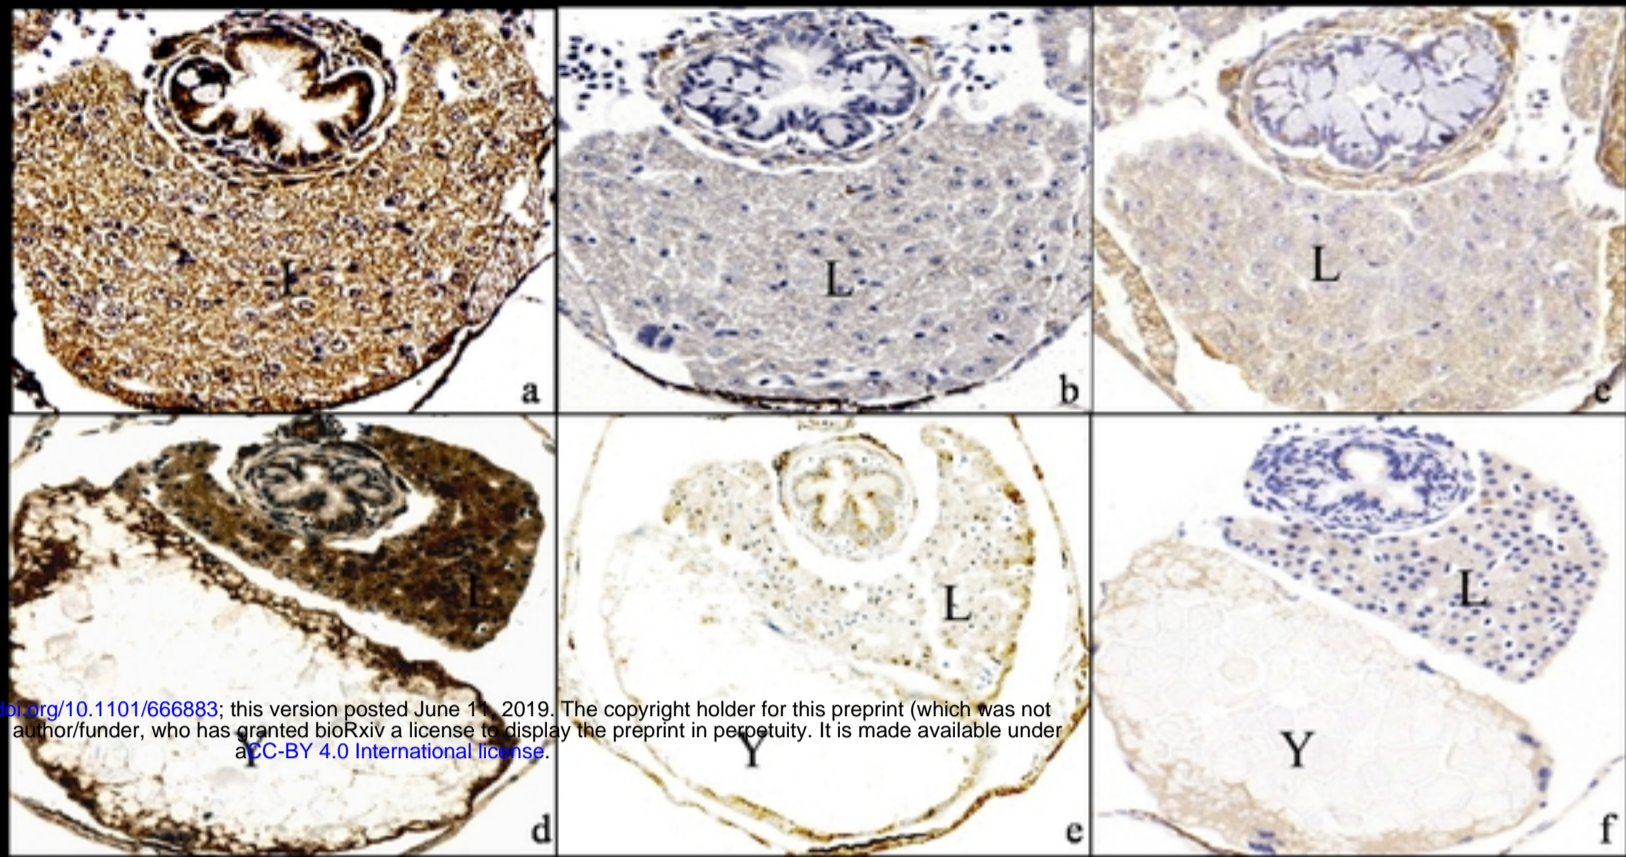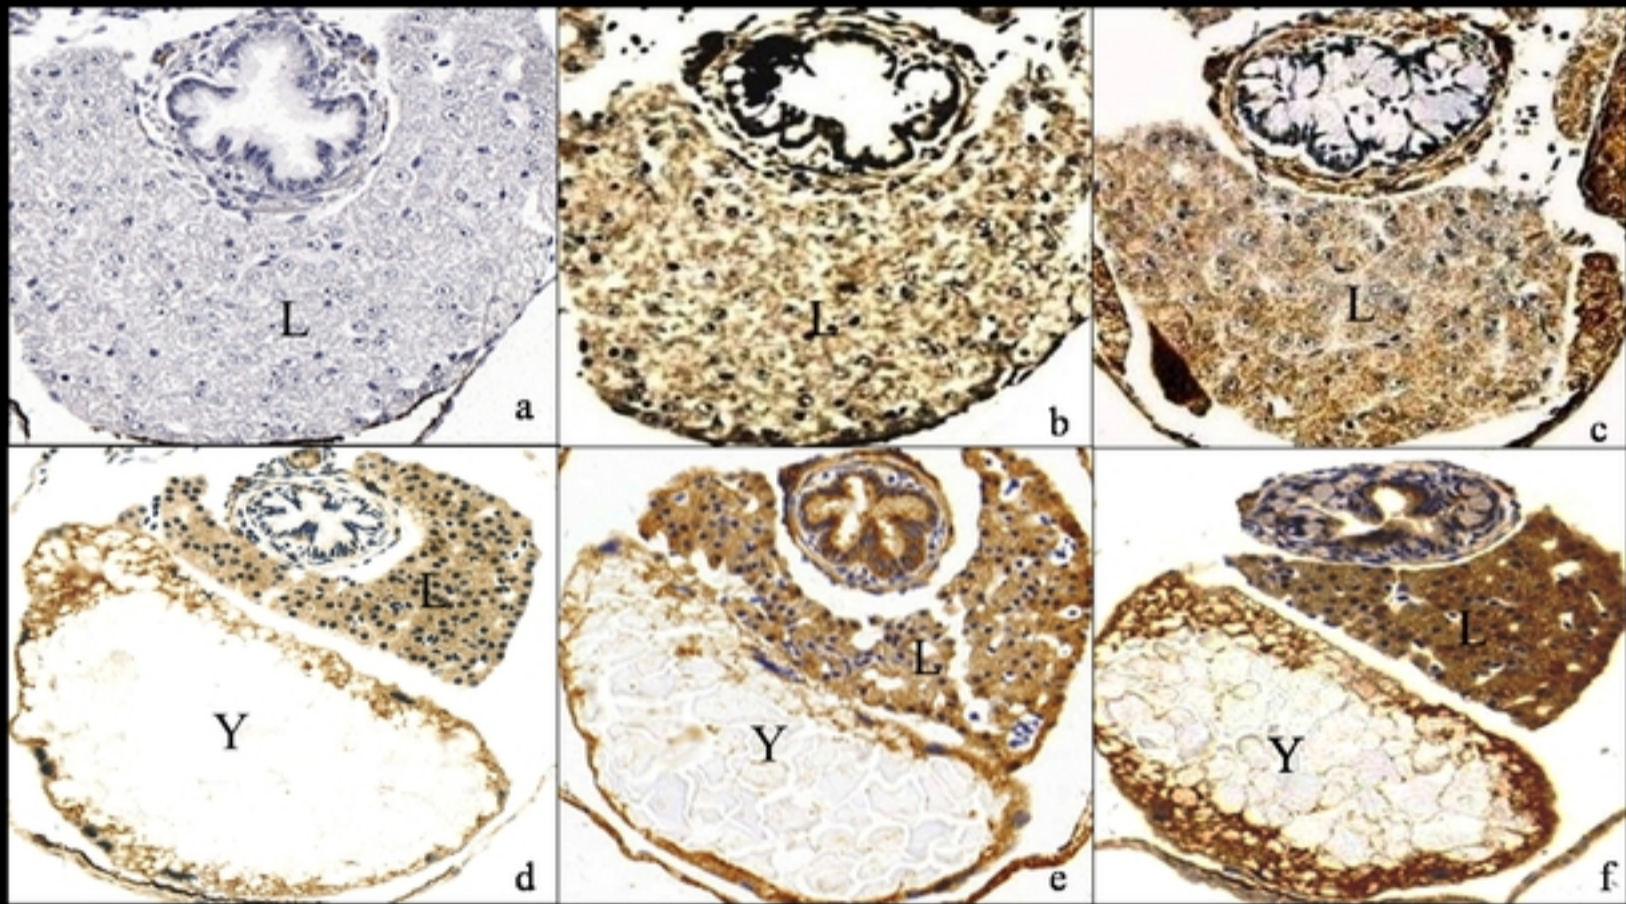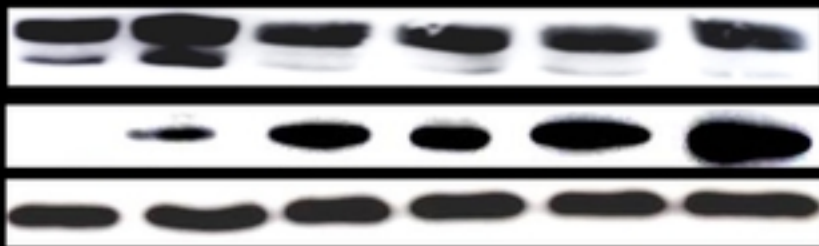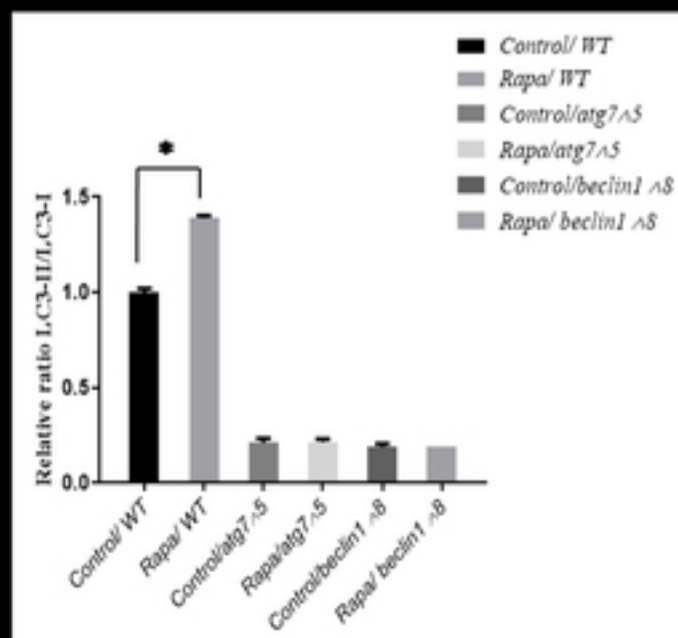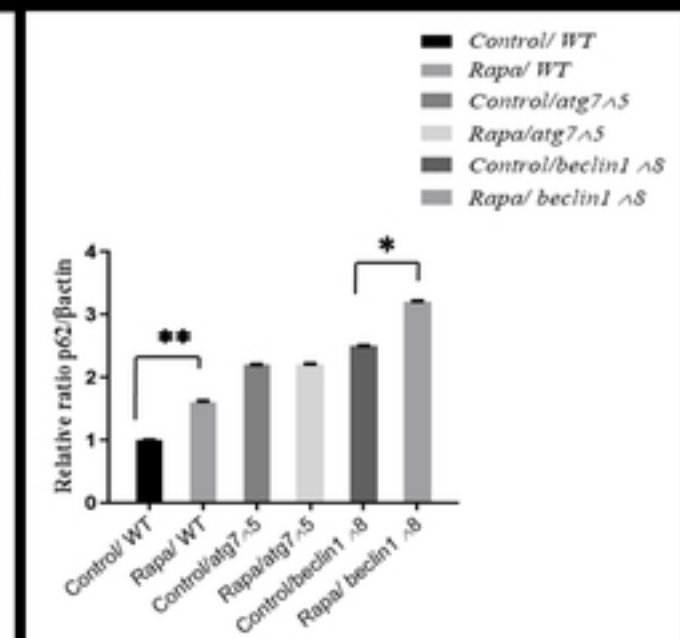

Figure



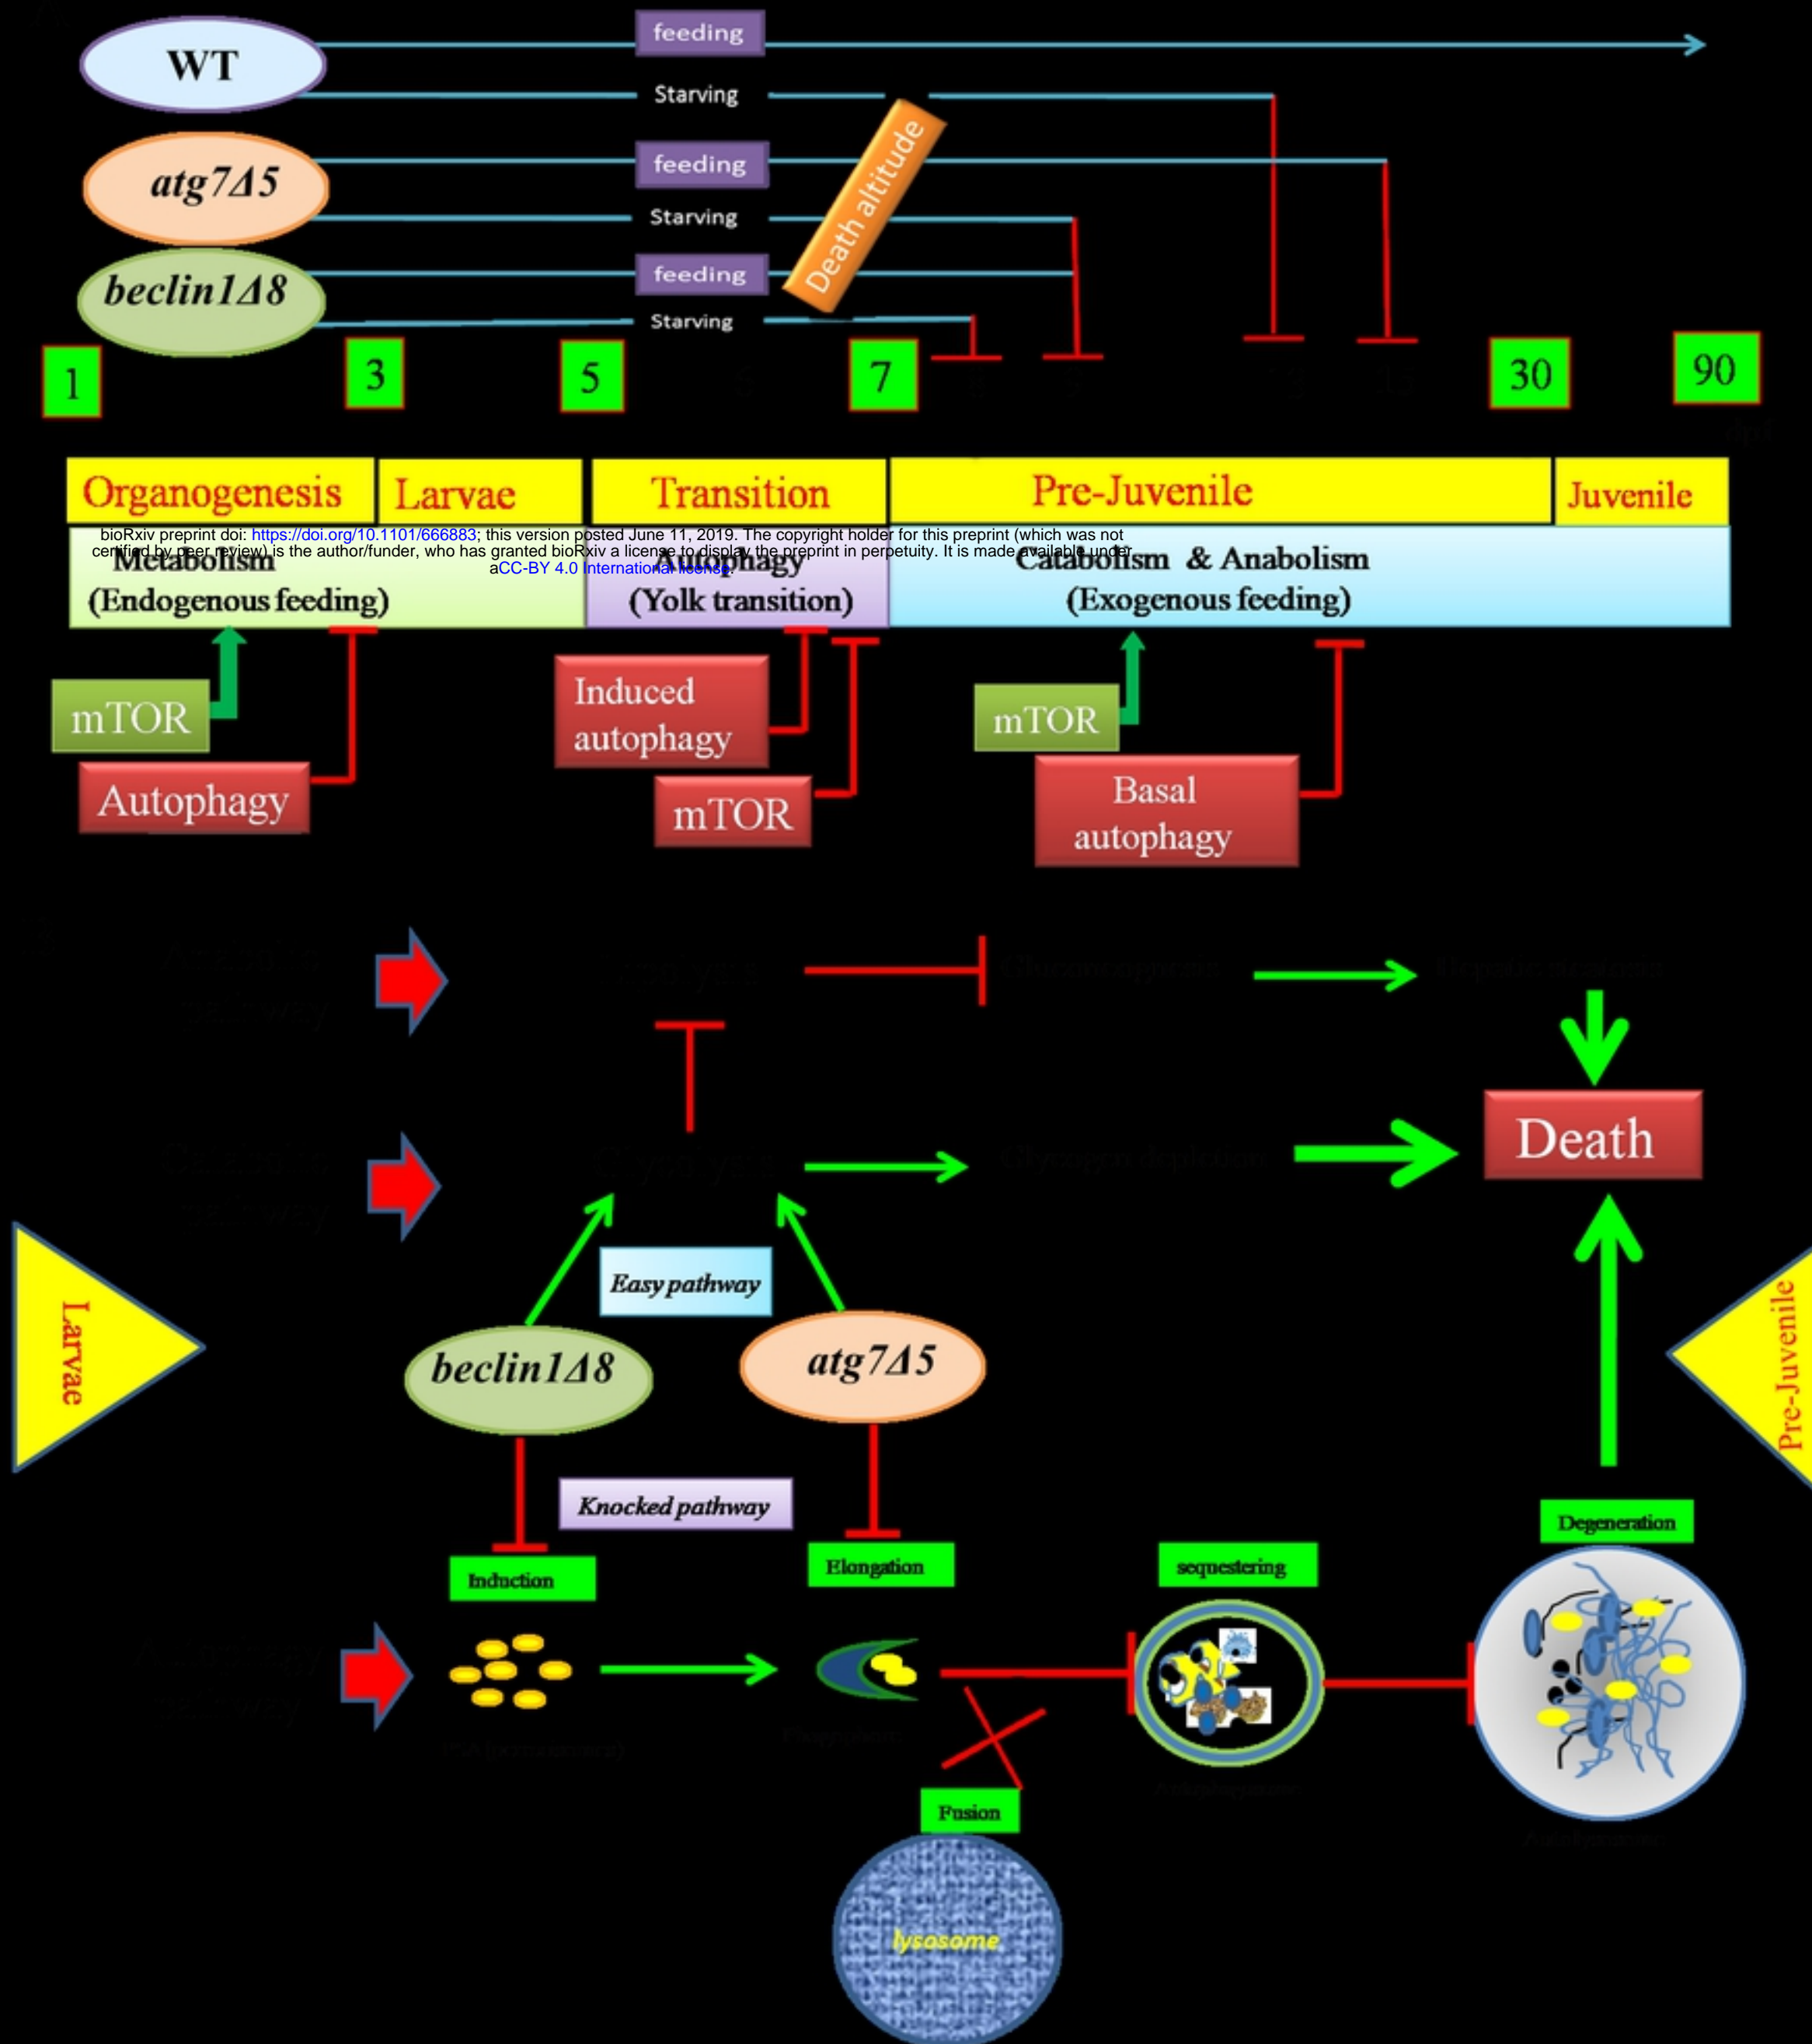

Figure
